1 **Inhibitors of VPS34 and lipid metabolism suppress SARS-CoV-2 replication**

2 Jesus A. Silvas,<sup>1,3</sup> Alexander S. Jureka<sup>1,3</sup>, Anthony M. Nicolini<sup>2</sup>, Stacie A. Chvatal<sup>2</sup>, and  
3 Christopher F. Basler<sup>1\*</sup>

4 <sup>1</sup> Center for Microbial Pathogenesis, Institute for Biomedical Sciences, Georgia State University,  
5 Atlanta, GA, 30303

6 <sup>2</sup> Axion BioSystems, Inc., Atlanta, GA 30309

7 <sup>3</sup> Equal contribution

8 \*Corresponding Author  
9 Christopher F. Basler PhD  
10 Center for Microbial Pathogenesis  
11 Institute for Biomedical Sciences  
12 Georgia State University  
13 Atlanta, GA 30307  
14 (404) 413—3651  
15 cbasler@gsu.edu  
16

17

18

19

20

21

22

23

24

25 **ABSTRACT**

26 Therapeutics targeting replication of SARS coronavirus 2 (SARS-CoV-2) are urgently needed.  
27 Coronaviruses rely on host membranes for entry, establishment of replication centers and egress.  
28 Compounds targeting cellular membrane biology and lipid biosynthetic pathways have  
29 previously shown promise as antivirals and are actively being pursued as treatments for other  
30 conditions. Here, we tested small molecule inhibitors that target membrane dynamics or lipid  
31 metabolism. Included were inhibitors of the PI3 kinase VPS34, which functions in autophagy,  
32 endocytosis and other processes; Orlistat, an inhibitor of lipases and fatty acid synthetase, is  
33 approved by the FDA as a treatment for obesity; and Triacsin C which inhibits long chain fatty  
34 acyl-CoA synthetases. VPS34 inhibitors, Orlistat and Triacsin C inhibited virus growth in Vero  
35 E6 cells and in the human airway epithelial cell line Calu-3, acting at a post-entry step in the  
36 virus replication cycle. Of these the VPS34 inhibitors exhibit the most potent activity.

37

38

39

40

41

42

43

44

45

## 46 INTRODUCTION

47 SARS-CoV-2, a member of the *Betacoronavirus* genus, is an enveloped positive-sense,  
48 RNA virus responsible for a current pandemic<sup>1</sup>. Because of its profound impact on society and  
49 human health there is an urgent need to understand SARS-CoV-2 replication requirements and to  
50 identify therapeutic strategies<sup>2</sup>. Repurposing drugs developed for other purposes may provide a  
51 shortcut to therapeutic development<sup>3-6</sup>. The use of compounds known to target specific host  
52 factors may also elucidate key pathways needed for virus replication.

53 Coronavirus (CoV) replication involves multiple critical interactions with host cell  
54 membranes, including during viral entry and virus release<sup>2, 7-9</sup>. In addition, one of the most  
55 striking features of CoV infection is the establishment of replication organelles that consist of  
56 double membrane vesicles (DMV), double-membrane spherules (DMSs) and convoluted  
57 membranes (CM) with DMVs serving as the main site of viral RNA synthesis<sup>10</sup>. The origin of  
58 these membrane organelles in beta-coronavirus infection remains incompletely understood. The  
59 membrane structures colocalize with LC3, a protein with well-known functions in autophagy<sup>7, 11</sup>.  
60 In murine embryonic stem cell lines, autophagy was found to be critical for DMV formation and  
61 replication of the beta-coronavirus mouse hepatitis virus<sup>7</sup>. However, studies in bone marrow  
62 derived macrophages or primary mouse embryonic fibroblasts lacking ATG5 indicated that  
63 autophagy is not essential for DMV formation or MHV replication<sup>11</sup>. An alternate model  
64 indicates that beta coronaviruses usurp vesicles known as EDEMosomes, which associate with  
65 non-lipidated LC3 and normally function to regulate ER-associated degradation (ERAD), to  
66 provide membranes for replication<sup>8</sup>.

67 Many enveloped, positive-sense RNA viruses that replicate in double membrane  
68 compartments have been demonstrated to be sensitive to inhibitors of various aspects of

69 membrane metabolism/biology. For example, VPS34 a class III phosphoinositol-3 kinase (PI3K)  
70 that plays roles in autophagy, endosomal trafficking, and other aspects of membrane biology has  
71 been implicated in the replication of hepatitis C virus (HCV) and tombusvirus (TBSV)<sup>12, 13</sup>. The  
72 compound Triacsin C, which inhibits an enzyme upstream of triglyceride synthesis, long chain  
73 fatty acyl CoA, impairs the growth of several viruses that require for replication lipid droplets,  
74 organelles that serve as storage sites for neutral lipids such as triacylglycerol<sup>14-16</sup>. Downstream of  
75 long chain fatty acyl CoA in the synthesis of triglycerides are diacylglycerol acyltransferases 1  
76 and 2 (DGAT1 and DGAT2). Inhibition of these enzymes inhibits HCV and rotavirus  
77 replication. More general inhibitors of fatty acid synthetase such as Orlistat, also decrease  
78 replication of several different viruses<sup>17-20</sup>.

79 Here we asked whether SARS-CoV-2 is susceptible to modulators of lipid metabolism by  
80 assessing the sensitivity of the virus in Vero E6 and Calu-3 cells to VPS34 inhibitors, Triacsin C,  
81 inhibitors of DGATs and Orlistat, an inhibitor of FASN<sup>21</sup>. We find that two inhibitors of VPS34  
82 potently inhibited SARS-CoV-2 replication, whereas an FDA-approved inhibitor of a different  
83 class of PI3K had minimal effect on replication. Targeting FASN and *de novo* synthesis of  
84 triacylglycerol, diacylglycerol and cholesterol esters each impairs SARS-CoV-2 replication  
85 whereas inhibition of DGATs was not effective. We also identified that each inhibitor exhibits  
86 antiviral effects post-entry and that they perturb the structure of viral replication centers. Taken  
87 together, the data presented here implicates specific lipid metabolism pathways in SARS-CoV-2  
88 replication and suggests that these pathways are promising therapeutic targets.

89

90 **MATERIALS AND METHODS**

## 91 **Virus and cell lines**

92 Vero E6 (ATCC# CRL-1586), Calu-3 (ATCC# HTB-55), and Caco-2 (ATCC# HTB-37)  
93 were maintained in DMEM (Corning) supplemented with 10% heat inactivated fetal bovine  
94 serum (FBS; GIBCO). Cells were kept in a 37°C, 5% CO<sub>2</sub> incubator without antibiotics or  
95 antimycotics. SARS-CoV-2, strain USA\_WA1/2020, was obtained from the World Reference  
96 Collection for Emerging Viruses and Arboviruses at the University of Texas Medical Branch-  
97 Galveston.

## 98 **Virus Propagation and Plaque Assays**

99 A lyophilized ampule of SARS-CoV-2 was initially resuspended in DMEM  
100 supplemented with 2% FBS. VeroE6 cells were inoculated in duplicate with a dilution of 1:100  
101 with an adsorption period of 1 hour at 37C and shaking every 15 minutes. Cells were observed  
102 for cytopathic effect (CPE) every 24 hours. Stock SARS-CoV-2 virus was harvested at 72 hours  
103 post infection (h.p.i) and supernatants were collected, clarified, aliquoted, and stored at -80°C.

104 For plaque assays, Vero E6 cells were seeded onto a 24-well plate 24 hours before  
105 infection. 100ul of SARS-CoV-2 serial dilutions were added, adsorbed for 1 hour at 37C with  
106 shaking at 15-minute intervals. After the absorption period, 1 mL of 0.6% microcrystalline  
107 cellulose (MCC; Sigma 435244) in serum-free DMEM was added. To stain plaque assays MCC  
108 was removed by aspiration, and 10% neutral buffered formalin (NBF) added for one hour at  
109 room temp and then removed. Monolayers were then washed with water and stained with 0.4%  
110 crystal violet. Plaques were quantified and recorded as plaque forming units (PFU)/mL.

## 111 **Confocal microscopy**

112 For confocal microscopy analysis, all cell lines were pre-seeded 24 hours before infection  
113 onto glass coverslips and infected with SARS-CoV-2 at a multiplicity of infection (MOI) of 1. At  
114 24 hours post-infection (h.p.i.) supernatant was removed, and samples fixed with 10% NBF for 1  
115 hour at room temperature followed by PBS wash and permeabilized with sterile filtered 0.1%  
116 Saponin in PBS. Cells were blocked with 0.1% Saponin in Fluorescent Blocker (ThermoFisher)  
117 for 1 hour at RT. Primary antibodies were added and incubated overnight at 4C. AlexaFluor488,  
118 594, and 647 conjugated secondary antibodies were used and nuclei stained with DAPI. Samples  
119 were imaged on Zeiss LSM800 Confocal with Super Resolution AiryScan. Images were  
120 rendered in ZenBlue or Imaris Viewer 9.0.

### 121 **Maestro Z Impedance Experiments**

122 Prior to cell plating, CytoView-Z 96-well electrode plates (Axion BioSystems, Atlanta,  
123 GA) were coated with 5 µg/mL human fibronectin (Corning) for 1 hr at 37C. After coating,  
124 fibronectin was removed and 100 µL of DMEM/10% FBS was added to each well. The plate was  
125 then docked into the Maestro Z instrument to measure impedance electrode baseline. Vero E6  
126 cells were then plated to confluency (~75,000 cells/well) in the coated CytoView-Z plates and  
127 left at room temperature for 1 hour to ensure even coverage of the well. Plates containing Vero  
128 E6 cells were then docked into the Maestro Z for 24 hours at 37°C/5% CO<sub>2</sub> to allow the cells to  
129 attach and the monolayer to stabilize, as measured by resistance, a component of impedance. The  
130 Maestro Z was used to monitor the resistance of the monolayer as it formed, very similar to  
131 transepithelial electrical resistance (TEER)<sup>22</sup>. In this study, resistance was measured at 10 kHz,  
132 which reflects both cell coverage over the electrode and strength of the barrier formed by the cell  
133 monolayer. For compound treatments, media was removed from wells of the CytoView-Z plates  
134 and 195 µL of pre-warmed DMEM/2% FBS was added with the indicated concentration of

135 compound. Infections with SARS-CoV-2 at an MOI of 0.01 were carried out by directly adding  
136 5  $\mu$ L of virus to each well. Plates were then docked within the Maestro Z and resistance  
137 measurements were continuously recorded for 48-72 hours post-infection. All plates contained  
138 media only, full lysis, uninfected, and SARS-CoV-2 infected controls. For calculation of percent  
139 inhibition, raw resistance values for each well were normalized to the value at 1 hour post-  
140 infection within the Axis Z software, and percent inhibition was calculated with the following  
141 formula: Percent Inhibition =  $100 * (1 - (1 - \text{average of treated cells}) / (1 - \text{average of infected}$   
142  $\text{control}))$ . Median time to death calculations were performed by fitting the Boltzmann sigmoid  
143 equation to raw kinetic resistance data in Graphpad Prism. Fifty percent maximum velocity  
144 (V50) values obtained from the Boltzmann sigmoid fits were used to determine median time to  
145 death for each MOI.

#### 146 **Cell viability assay**

147 VeroE6 or Calu-3 cells were seeded in 96-well black walled microplates and incubated  
148 overnight. Cells were then treated with compounds and CellTox Green Dye (Promega) to  
149 monitor compound cytotoxicity. Fluorescence (Excitation: 485nm, Emission: 520nm) was  
150 measured every 24 hours post treatment for 3 days. Percent viability was determined using the  
151 minimum fluorescence obtained from media only cells and the maximum value obtained by cells  
152 lysed with 1% Triton-X.

#### 153 **Labeling of nascent viral RNA**

154 VeroE6 cells were seeded onto glass coverslips and incubated overnight at 37C. Cells  
155 were then infected with SARS-CoV-2 at an MOI of 3. At 24 h.p.i. cells were treated with 1 $\mu$ M  
156 of Actinomycin D (Sigma) for 1 hour. Nascent RNA was labeled using Click-iT™ RNA

157 Alexa Fluor™ 594 Imaging Kit (ThermoFisher). Cells were then processed for confocal  
158 analysis.

## 159 **Compounds**

160 VPS34 IN-1 (#17392), PIK-III (#17002), Triacsin C (#10007448), and  
161 Orlistat (#10005426) were purchased from Cayman Chemical (Ann Arbor,  
162 Michigan). Remdesivir was purchased from Target Molecule Corp. (T7766, Boston,  
163 Massachusetts). T863 (#SML0539) and PF06424439 (#PZ0233) were purchased from Sigma-  
164 Aldrich (St. Louis, Missouri). All chemicals were resuspended in dimethylsulfoxide  
165 (DMSO).<sup>23</sup>

## 166 **RESULTS**

### 167 **Development of 96-well format assay to measure SARS-CoV-2 cytopathic effects**

168 SARS-CoV-2 induces significant cytopathic effects in infected Vero E6 cells. Based on  
169 this property, we standardized a 96-well format assay that provides continuous real-time, label-  
170 free monitoring of the integrity of cell monolayers, thereby providing assessment of virus growth  
171 through decreased cell viability. This assay was standardized using the Maestro Z platform  
172 (Axion BioSystems, Atlanta, GA), an instrument that uses 96-well plates containing electrodes in  
173 each well (CytoView-Z plates). The electrodes measure electrical impedance across the cell  
174 monolayer every minute throughout the course of the experiment. As SARS-CoV-2 replication  
175 damages the cell monolayer, impedance measurements decrease over time, providing a detailed  
176 assessment of infection kinetics.

177 The capacity of the system to differentiate different levels of virus replication was first  
178 assessed. Confluent Vero E6 monolayers in CytoView-Z plates were infected with SARS-CoV-2



179 at multiple MOIs (10 to 0.0001) and resistance measurements were acquired for 72 hours post-  
180 infection. As shown in **Figure 1A**, the progression of infection at each MOI was clearly distinct.  
181 A decrease in resistance could be observed as early as 18-20 h.p.i. at an MOI of 10 and 1, and as  
182 late as 56 h.p.i. at an MOI of 0.0001. Depending on MOI, signals reached their nadirs between  
183 32 to 72 h.p.i. To correlate with a decrease in resistance, the raw kinetic data was used to  
184 determine the median time to cell death for each MOI (**Figure 1B**). Based on its desirable  
185 kinetics, the MOI of 0.01 was chosen for the screening of compounds for antiviral activities.

186 To establish the Maestro Z as a potential instrument for screening of anti-SARS-CoV-2  
187 therapeutics, we first tested Remdesivir, a well-described inhibitor of SARS-CoV-2 that has been  
188 granted emergency use authorization (EUA) for the treatment of COVID-19<sup>24, 25</sup>. Vero E6 cells  
189 were seeded on a CytoView-Z plate, incubated overnight to allow cells to stabilize, pretreated  
190 with 6-fold dilutions of Remdesivir for 1 hour and infected with SARS-CoV-2. Resistance  
191 measurements were recorded for 48 h.p.i. (**Figure 1C**). In agreement with previous studies, we  
192 determined an 50% inhibitory concentration (IC<sub>50</sub>) for Remdesivir of 1.54  $\mu$ M (**Figure 1D**)<sup>24</sup>.  
193 Taken together, these data validate the impedance-based assay described as a tool for screening  
194 of potential SARS-CoV-2 therapeutics.

### 195 **Inhibitors of VPS34 activity impair SARS-CoV-2 growth**

196 VPS34 is a multifunctional protein involved in autophagy and membrane trafficking.  
197 Since coronaviruses induce formation of double membrane vesicles for replication, we wanted to  
198 determine if VPS34 activity was essential for SARS-CoV-2 replication. Therefore, we tested two  
199 well characterized VPS34 inhibitors IN-1 (referred as VPS34-IN1 below) and PIK-III over a 10-  
200 point dose response in the resistance assay<sup>26</sup>. The compounds were added to pre-plated Vero E6  
201 cells 1 hour prior to infection with SARS-CoV-2 at a MOI of 0.01. Both VPS34-IN1 and PIK-III

202 induced rapid cytotoxicity at 50  $\mu$ M and 16.67  $\mu$ M as indicated by a rapid decrease in resistance  
203 measurements between 1 and 20 h.p.i. (**Figure 2A and 2C**). However, at concentrations of 5.56  
204  $\mu$ M and below, the integrity of the monolayer was preserved relative to the mock-treated control  
205 indicating an antiviral effect and an absence of cytotoxicity. Calculations based on normalized  
206 resistance measurements at 48 h.p.i for non-toxic doses yielded IC<sub>50</sub>s of 0.29 $\mu$ M for VPS34-IN1  
207 and 0.202 $\mu$ M for PIK-III (**Figure 2B and 2D, respectively**). Additionally, IC<sub>90</sub>s of 2.52  $\mu$ M  
208 (VPS34-IN1) and 1.81  $\mu$ M (PIK-III) were also calculated. These data suggest that the VPS34  
209 kinase plays a significant role in SARS-CoV-2 replication and is a potential target for therapeutic  
210 intervention.

### 211 **Inhibition of fatty acid metabolism inhibits SARS-CoV-2 replication**

212 Fatty acid metabolism leads to production of triglycerides, phospholipids and other  
213 molecules<sup>27</sup>. Elongation of the phospholipid membranes can be aided by channeling fatty acid  
214 into phospholipid synthesis<sup>28</sup>. Modulation of fatty acid metabolism has been shown to impact  
215 several viruses such as dengue virus, hepatitis C virus, and Old World alphaviruses<sup>18, 29, 30</sup>. Two  
216 well-described compounds that inhibit fatty acid metabolism are Orlistat and Triacsin C, both of  
217 which have been shown to have antiviral activity<sup>19, 30</sup>. Orlistat is an FDA-approved drug that  
218 inhibits lipases and also fatty acid synthase (FASN), and Triacsin C inhibits long chain Acyl-  
219 CoA synthetases. To test these against SARS-CoV-2, VeroE6 cells were pre-seeded onto a  
220 CytoView-Z plate, allowed to stabilize and then pre-treated with Triacsin C or Orlistat for 1 hour  
221 before infection with SARS-CoV-2 at an MOI of 0.01. Based on the toxicity window of 1-20  
222 h.p.t. determined with the VPS34 inhibitors, neither Triacsin C nor Orlistat induced early  
223 cytotoxic effects, even at the highest concentrations of 50 $\mu$ M and 500 $\mu$ M, respectively (**Figure**  
224 **3A and 3C**). Both compounds exhibited inhibition at the higher concentrations tested, although

225 complete inhibition was not achieved even with 500  $\mu$ M of Orlistat. Based on the data we  
226 extrapolated an IC<sub>50</sub> of 422.3 $\mu$ M for Orlistat and calculated an IC<sub>50</sub> of 19.5 $\mu$ M for Triacsin C  
227 (**Figure 3B and 3D**). Viruses such as HCV and rotavirus that are sensitive to inhibition by  
228 Triacsin C are also impaired by inhibitors of DGATs<sup>14, 31</sup>. Therefore, we tested the effects of  
229 DGAT1 and DGAT2 inhibitors T863 and PF06424439<sup>32, 33</sup>. Neither compound displayed any  
230 inhibitory activity (**Supplemental Figure 1**). This data suggests that metabolism of fatty acids  
231 plays an important role in SARS-CoV-2 infection.

### 232 **VPS34 inhibitors exhibit potent attenuation of SARS-CoV-2 early and late in its replication** 233 **cycle**

234 Next, time-of-addition studies were performed. We sought to determine how long the  
235 addition of VPS34-IN1, PIK-III, Orlistat, or Triacsin C could be postponed before activity was  
236 lost. Additionally, this would identify if the anti-viral activity of each compound impacted a pre-  
237 or post- viral entry step. As indicated in **Figure 4A**, 4 conditions were tested 1) single treatment  
238 1 hour prior to viral infection, with compound removed just prior to infection; 2) 1 hour pre-  
239 treatment with continuous dosing; 3) dosing at 2 h.p.i.; and 4) dosing at 4 h.p.i.. VeroE6 cells  
240 were pre-seeded onto a CytoView-Z plate and allowed to stabilize, compounds were added, and  
241 resistance was monitored for 48 hours after infection. Percent inhibition was calculated based on  
242 resistance values at 48 h.p.i. We observed that a single 5  $\mu$ M treatment of VPS34-IN1 or PIK-III  
243 inhibited SARS-CoV-2 replication (**Figure 4B**). Additionally, inhibition was observed even  
244 when added after 4 h.p.i. In contrast, removal of Orlistat or Triacsin C before infection,  
245 eliminated their efficacy. Maintenance throughout the experiment was inhibitory, as was addition  
246 at 2 or 4 hours post infection. Interestingly, delayed treatment with Triacsin C at 50 $\mu$ M exhibited  
247 greater anti-viral activity that initiating the treatment one hour prior to infection. Altogether,

248 these data demonstrate activity of the VPS34 inhibitors at both early and late, post-entry time  
249 points and indicate that the effects of Orlistat and Triacsin C are likely post-entry.

250 **Attenuation of VPS34 kinase activity and fatty acid metabolism inhibit SARS-CoV-2**  
251 **in a human airway epithelial cell line**

252 We proceeded to investigate if the inhibitors were effective in the human lung carcinoma  
253 cell line, Calu-3, by directly measuring production of infectious virus and cytotoxicity. That this  
254 cell line is derived from the human airway and is highly susceptible to infection has established it  
255 as a standard for infection studies with SARS-CoV-1, MERS-CoV and SARS-CoV-2<sup>34, 35</sup>. Calu-  
256 3 cells were plated onto 96-well plates and allowed to reach 95% confluency. Cells were then  
257 pre-treated with a range of concentrations of VPS34-IN1, PIK-III, Triacsin C, Orlistat, DMSO,  
258 or mock treated with media alone for 1 hour then infected with SARS-CoV-2 at an MOI of 0.01.  
259 Supernatants were collected at 48 h.p.i. and titered on VeroE6 cells by plaque assay. In parallel,  
260 to determine cytotoxicity of these compounds, Calu-3 cells were seeded onto 96-well black  
261 walled 96-well plates, allowed to reach 95% confluency and treated with VPS34-IN1, PIK-III,  
262 Triacsin C, Orlistat, DMSO, or mock treated with media alone. CellTox Green was added at the  
263 time of dosing and fluorescence measured at 48 h.p.i. in order to assess cytotoxicity. Each of the  
264 compounds inhibited production of infectious virus, as measured by plaque assay on Vero E6  
265 cells **Figure 5A, C, E, and G**). In contrast to VeroE6 cells, no cytotoxicity was observed even at  
266 the highest dose for each compound in Calu-3 cells. We observed IC<sub>50</sub>s of 0.55 $\mu$ M (VPS34-  
267 IN1), 0.12 $\mu$ M (PIK-III), 21.25 $\mu$ M (Orlistat), and 0.04 $\mu$ M (Triacsin C), as shown in **Figure 5B,**  
268 **D, F, and H**, respectively. Importantly, the IC<sub>50</sub>s calculated for VPS34-IN1 and PIK-III by  
269 measuring infectious virus are in close agreement with IC<sub>50</sub>s calculated in Vero E6 cells using  
270 the resistance-based assay. The IC<sub>50</sub>s for Triacsin C and Orlistat were substantially lower than in

271 the Vero cells. These data suggest that attenuation of the kinase activity of VPS34, synthesis of  
272 fatty acids or production of long chain fatty acyl-CoA in human bronchial epithelial cells inhibits  
273 replication of SARS-CoV-2.

274 VPS34 is a class III PI3 kinase. We therefore extended our study to determine if  
275 BYL719, an FDA approved inhibitor of class I PI3 kinase used to treat breast cancer, would also  
276 inhibit SARS-CoV-2 replication in Calu-3 cells. Unlike the VPS34-specific inhibitors, little  
277 inhibition was detected up to 16.6  $\mu$ M, at which we observed a 1-log decrease in viral titers  
278 (**Supplemental Figure 2**). This data suggests that not all PI3K classes play a significant role  
279 during SARS-CoV-2 replication.

## 280 **Inhibition of VPS34 kinase activity and fatty acid metabolism disperse SARS-CoV-2** 281 **replication centers**

282 SARS-CoV-1 and MERS-CoV replicate in double membrane compartments to which the  
283 autophagy membrane marker LC3 localizes<sup>8, 9, 23</sup>. We investigated if, similar to SARS-CoV-1  
284 and MERS, SARS-CoV-2 nascent viral RNA and N co-localized with LC3. VeroE6 cells were  
285 infected with SARS-CoV-2 at a MOI of 3 and at 24 h.p.i., were treated with 1 $\mu$ M of actinomycin  
286 D to arrest host-cell transcription. Cells were then chased for 4 hours with 5-ethynyl uridine  
287 (EU). Viral nascent RNA labeled during the EU chase was then detected with click chemistry,  
288 indirect immunofluorescence performed using primary antibodies against N and LC3, and the  
289 endoplasmic reticulum (ER) was detected with DPX BlueWhite ER stain. We observed distinct  
290 formation of ring-like structures positive for ER, N, LC3, and nascent viral RNA (**Supplemental**  
291 **Figure 3A**). Co-localization analysis demonstrated that nascent viral RNA co-localized with N  
292 or LC3 (**Supplemental Figure 3B**). This data demonstrates the presence of SARS-CoV-2  
293 replication centers that form in association with LC3.

294 Because each compound exhibited inhibitory effects when added after viral entry, we  
295 next asked whether the compounds altered the establishment of viral replication centers. Calu-3  
296 cells were seeded onto fibronectin coated glass cover slips and allowed to reach 95% confluency.  
297 Cells were pre-treated with approximately the IC<sub>90</sub> of VPS34-IN1 (5 μM), PIK-III (5 μM),  
298 Orlistat (500 μM), or Triacsin C (50 μM) and infected with SARS-CoV-2 at a MOI of 3. At 24  
299 h.p.i. cells were fixed, permeabilized, and indirect immunofluorescence performed using primary  
300 antibodies against SARS-CoV-2 nucleoprotein (N) and dsRNA. We observed that when  
301 compared to the media only or DMSO controls, N became completely cytoplasmic and did not  
302 form any large inclusion like formations in the presence of the compounds (**Figure 6**).  
303 Additionally, even though dsRNA could be detected both distributed throughout the cytoplasm  
304 and associated with N in large inclusion like formations in the media only and DMSO controls,  
305 in the cells treated with inhibitors, dsRNA was only found distributed throughout the cytoplasm.  
306 This data suggests that the compound disrupt replication center formation.

## 307 **DISCUSSION**

308 Here, we demonstrate that two VPS34 inhibitors, Orlistat, and Triacsin C each have clear effects  
309 on SARS-CoV-2 replication and the morphology of viral replication centers. Generation of  
310 replication centers is a key feature of the replication of many viruses<sup>36-38</sup>. These can serve as sites  
311 where required components concentrate within a relatively closed environment and hide viral  
312 replication products from the host innate immune response<sup>39</sup>. In order to generate these centers,  
313 many viruses usurp host cellular pathways that are used to generate membranes or organelles<sup>38</sup>.  
314 *Betacoronaviruses* have been shown to target the ERAD-EDEMosome-ER pathways to generate  
315 double-membrane vesicles required for their replication<sup>8</sup>. The data presented here suggests roles  
316 for VPS34, FASN, and long chain fatty acyl CoA in replication center formation and stability

317 suggesting a role for these host factors in providing the membranes needed for SARS-CoV-2  
318 replication organelles.

319 VPS34 is of interest as a therapeutic target for a variety of conditions, including aging,  
320 neurodegeneration and cancer<sup>40, 41</sup>. The two VPS34 inhibitors tested were VPS34-IN1 and PIK-  
321 III which have *in vitro* IC50s for VPS34 of 25 nM and 18 nM, respectively<sup>26, 42</sup>. These were the  
322 most potent compounds versus SARS-CoV-2 tested in this study. Each displayed an IC50 of less  
323 than 1µM in either Vero E6 cells or Calu-3 cells. Activity in the Vero E6 cells was measured  
324 based on the capacity of the compounds to prevent viral cytopathic effects as measured by  
325 resistance across the cell monolayer, whereas the Calu-3 cell assay measured inhibition of  
326 production of infectious virus particles. The resistance-based assay provided a built-in measure  
327 of cell viability and integrity of the cell monolayer, providing assurance that decreases in  
328 resistance measurements initially post-infection were not reflective of cytopathic effects. We also  
329 independently determined that the compounds tested were non-toxic in Calu3 cells, likewise  
330 demonstrating that decreases in viral titer were not due to compound toxicity. Based on the Calu-  
331 3 data, the selectivity indices (SI) (CC50/IC50) for the compounds are >90 and >416 for VPS34-  
332 IN1 and PIK-III, respectively.

333 VPS34 is a phosphoinositide kinase that functions in autophagy, endosomal trafficking  
334 and other cellular functions<sup>43</sup>. VPS34 associates with VPS15 as well as with other proteins to  
335 carry out its activities. One VPS34-containing complex, Complex I, includes VPS34, VPS15,  
336 Beclin 1 and ATG14 and is critical for autophagosome formation. Complex II includes VPS34,  
337 VPS15, Beclin 1 and UVRAG and functions in autophagosome-lysosome fusion and in  
338 regulation of endosomes and multivesicular bodies<sup>43</sup>. While our inhibitor studies do not  
339 differentiate between the various functions of VPS34 that might be involved in SARS-CoV-2

340 replication,. Autophagy has been implicated as necessary for MHV replication, however,  
341 subsequent studies in different cell types suggest autophagy is not essential for MHV growth<sup>7, 11</sup>.  
342 Further, recent studies suggest that coronaviruses interfere with autophagy and that activation of  
343 autophagy can inhibit replication of SARS-CoV, MERS CoV, and SARS-CoV-2<sup>44, 45</sup>. Given that  
344 inhibition of VPS34 results in the inhibition of autophagy<sup>26, 42</sup>, it would be expected that  
345 inhibition of VPS34 would eliminate these anti-CoV effects of autophagy and promote SARS-  
346 CoV-2 replication. Therefore, the disruptions in SARS-CoV-2 replication due to VPS34  
347 inhibition described here may, instead, reflect inhibition of non-autophagy related functions of  
348 VPS34.

349 Separate from autophagy, VPS34 has several other roles including in endosomal trafficking  
350 and retrograde endosome-to-Golgi transport<sup>43</sup>. For the positive-sense RNA virus TBSV, VPS34  
351 was implicated in providing phosphatidylethanolamine-enriched membranes for formation of  
352 TBSV replication centers<sup>13</sup>. Based on our observation that VPS34 inhibitors disrupt the structure  
353 of SARS-CoV-2 replication centers, it is possible that VPS34 functions to facilitate membrane  
354 availability for SARS-CoV-2 replication organelle formation. Disruption of endocytic trafficking  
355 might also explain our observation that pre-treatment with VPS34 inhibitors alone had  
356 significant effects on SARS-CoV-2 replication.

357 Orlistat (tetrahydrolipstatin) is an FDA-approved weight loss drug that is taken orally and  
358 inhibits gastric and pancreatic lipases in the digestive tract, reducing uptake of lipids<sup>21</sup>. Orlistat  
359 also inhibits fatty acid synthase (FASN)<sup>46</sup>. Orlistat and other FASN inhibitors have previously  
360 been examined for their anti-cancer and antiviral activities. Although the clinically approved oral  
361 administration of Orlistat does not result in its significant systemic distribution, pre-clinical  
362 studies in mice have demonstrated that systemic administration of Orlistat is well tolerated<sup>47</sup>.



363 Orlistat has been demonstrated to have activity against several viruses, including varicella-zoster  
364 virus (VZV), coxsackievirus B3 virus (CVB3), dengue virus (DENV), and other flaviviruses.  
365 DENV uses its nonstructural protein 3 to recruit FASN to viral replication sites and enhances  
366 synthesis of fatty acids<sup>48</sup>. As in our study, flaviviruses were sensitive to relatively high  
367 concentrations of Orlistat and antiviral effects could be demonstrated when Orlistat was added to  
368 cells post-infection<sup>17</sup>. Virus inhibition has typically been demonstrated at relatively high  
369 concentrations of Orlistat, such as 100 $\mu$ M or higher for CVB3, and between 10 $\mu$ M and 84 $\mu$ M for  
370 DENV3, depending on the timepoint post-infection DENV3 replication was measured<sup>17, 19, 49</sup>.  
371 For DENV3, the effect of Orlistat appeared to be after the early stages of infection<sup>18</sup>. This may  
372 reflect the need for DENV to recruit FASN to sites of virus replication and to upregulate fatty  
373 acid synthesis<sup>48, 50</sup>. It will be of interest to determine whether SARS-CoV-2 similarly depends on  
374 an upregulation of fatty acid synthesis.

375 Triacsin C inhibits long chain fatty acid acyl-CoA synthetase. Interestingly, the long chain  
376 fatty acid acyl-CoA synthetase ACSL3 was identified as an interactor of SARS-CoV-2 non-  
377 structural protein 7, suggesting a role for this enzyme in virus replication<sup>51</sup>. Triacsin C also has  
378 demonstrated antiviral activity for HCV and rotavirus<sup>14-16</sup>. For both HCV and rotavirus, the  
379 antiviral effects of Triacsin C have been linked to reliance of these viruses on lipid droplets for  
380 their replication<sup>14-16</sup>. Lipid droplets are organelles that store neutral lipids of which triglycerides  
381 are a major component<sup>52</sup>. By inhibiting long chain fatty acyl CoA, Triacsin C blocks lipid droplet  
382 formation. That antiviral activity against HCV and rotavirus is connected to lipid droplet  
383 formation is supported by the fact that these viruses are sensitive to inhibition by the DGAT  
384 inhibitors, T863 and PF06424439. In contrast, the compounds did not exhibit any activity against  
385 SARS-CoV-2 in Vero E6 cells whereas Triacsin C did. This suggests an alternate role for long

386 chain fatty acyl CoA or its downstream metabolites other than triacylglycerol and lipid droplets.  
387 It is notable that the IC50 for Triacsin C was substantially lower in the Calu-3 cell assay as  
388 compared to the Vero cell assay. A lesser decrease in IC50 was also noted for Orlistat in the  
389 Calu-3 cells versus the Vero E6 cells. These observations may reflect different degrees of  
390 dependence of the virus on fatty acid metabolism in different cell types. From the perspective of  
391 antiviral development, it is encouraging that the human airway-derived cells are the more  
392 sensitive system given that SARS-CoV-2 targets the respiratory tract. Triacsin C has been  
393 administered to mice daily for up to two months without overt signs of significant toxicity and  
394 resulted in a decrease in atherosclerosis<sup>53</sup>. However, the pharmacokinetics and cell penetrance of  
395 Triacsin C are viewed as significant impediments to its clinical use<sup>54</sup>. Despite this, Triacsin C  
396 analogs have been developed<sup>15</sup>, and long chain fatty acyl CoA synthetases are of interest as  
397 potential therapeutics for cancer as well as for viruses<sup>54</sup>.

398 Cumulatively, these data support lipid metabolism as a potential therapeutic target for SARS-  
399 CoV-2 infection. The specific mechanisms by which VPS34 promotes SARS-CoV-2 replication  
400 and the precise manner in which the VSP34 inhibitors impair replication warrant further  
401 investigation. Additionally, the specific enzymes and products of fatty acid metabolism  
402 necessary for efficient SARS-CoV-2 growth in human airway epithelial cells should be further  
403 explored to more precisely identify relevant targets for therapeutic targeting. Further, it will be of  
404 interest to understand the relative efficacies of inhibitors of fatty acid metabolism in different cell  
405 types.

406

407 **Acknowledgments.** This work was supported by NIH grants R01AI125453 and P01AI120943  
408 (Amarasinghe) to CFB. We would like to thank the Georgia State University High Containment  
409 team Natasha Griffith, Martin Wildes, and Robert “Mike” Walsh for their continuous support.

410

411 **Competing Interests.** Authors A.M.N. and S.A.C. are employees of Axion BioSystems who  
412 provided the Axion Maestro Z instrument used in these studies.

413

## 414 References

- 415 1. Lundstrom, K. Coronavirus Pandemic-Therapy and Vaccines. *Biomedicines* **8** (2020).
- 416 2. Wang, L., Wang, Y., Ye, D. & Liu, Q. Review of the 2019 novel coronavirus (SARS-  
417 CoV-2) based on current evidence. *Int J Antimicrob Agents* **55**, 105948 (2020).
- 418 3. García-Serradilla, M., Risco, C. & Pacheco, B. Drug repurposing for new, efficient,  
419 broad spectrum antivirals. *Virus Res* **264**, 22-31 (2019).
- 420 4. Pizzorno, A., Padey, B., Terrier, O. & Rosa-Calatrava, M. Drug Repurposing Approaches  
421 for the Treatment of Influenza Viral Infection: Reviving Old Drugs to Fight Against a  
422 Long-Lived Enemy. *Front Immunol* **10**, 531 (2019).
- 423 5. Saini, K.S. *et al.* Repurposing anticancer drugs for COVID-19-induced inflammation,  
424 immune dysfunction, and coagulopathy. *Br J Cancer* (2020).
- 425 6. Li, G. & De Clercq, E. Therapeutic options for the 2019 novel coronavirus (2019-nCoV).  
426 *Nat Rev Drug Discov* **19**, 149-150 (2020).
- 427 7. Prentice, E., Jerome, W.G., Yoshimori, T., Mizushima, N. & Denison, M.R. Coronavirus  
428 replication complex formation utilizes components of cellular autophagy. *J Biol Chem*  
429 **279**, 10136-10141 (2004).
- 430 8. Reggiori, F. *et al.* Coronaviruses Hijack the LC3-I-positive EDEMosomes, ER-derived  
431 vesicles exporting short-lived ERAD regulators, for replication. *Cell Host Microbe* **7**,  
432 500-508 (2010).
- 433 9. Reggiori, F., de Haan, C.A. & Molinari, M. Unconventional use of LC3 by coronaviruses  
434 through the alleged subversion of the ERAD tuning pathway. *Viruses* **3**, 1610-1623  
435 (2011).
- 436 10. Snijder, E.J. *et al.* A unifying structural and functional model of the coronavirus  
437 replication organelle: Tracking down RNA synthesis. *PLoS Biol* **18**, e3000715 (2020).
- 438 11. Zhao, Z. *et al.* Coronavirus replication does not require the autophagy gene ATG5.  
439 *Autophagy* **3**, 581-585 (2007).
- 440 12. Su, W.C. *et al.* Rab5 and class III phosphoinositide 3-kinase Vps34 are involved in  
441 hepatitis C virus NS4B-induced autophagy. *J Virol* **85**, 10561-10571 (2011).
- 442 13. Feng, Z., Xu, K., Kovalev, N. & Nagy, P.D. Recruitment of Vps34 PI3K and enrichment  
443 of PI3P phosphoinositide in the viral replication compartment is crucial for replication of  
444 a positive-strand RNA virus. *PLoS Pathog* **15**, e1007530 (2019).
- 445 14. Liefhebber, J.M., Hague, C.V., Zhang, Q., Wakelam, M.J. & McLauchlan, J. Modulation  
446 of triglyceride and cholesterol ester synthesis impairs assembly of infectious hepatitis C  
447 virus. *J Biol Chem* **289**, 21276-21288 (2014).
- 448 15. Kim, Y. *et al.* Novel triacsin C analogs as potential antivirals against rotavirus infections.  
449 *Eur J Med Chem* **50**, 311-318 (2012).
- 450 16. Cheung, W. *et al.* Rotaviruses associate with cellular lipid droplet components to  
451 replicate in viroplasms, and compounds disrupting or blocking lipid droplets inhibit  
452 viroplasm formation and viral replication. *J Virol* **84**, 6782-6798 (2010).
- 453 17. Hitakarun, A. *et al.* Evaluation of the antiviral activity of orlistat (tetrahydrolipstatin)  
454 against dengue virus, Japanese encephalitis virus, Zika virus and chikungunya virus. *Sci*  
455 *Rep* **10**, 1499 (2020).
- 456 18. Tongluan, N. *et al.* Involvement of fatty acid synthase in dengue virus infection. *Virol J*  
457 **14**, 28 (2017).

- 458 19. Ammer, E. *et al.* The anti-obesity drug orlistat reveals anti-viral activity. *Med Microbiol*  
459 *Immunol* **204**, 635-645 (2015).
- 460 20. Esser, K. *et al.* Lipase inhibitor orlistat prevents hepatitis B virus infection by targeting  
461 an early step in the virus life cycle. *Antiviral Res* **151**, 4-7 (2018).
- 462 21. Heck, A.M., Yanovski, J.A. & Calis, K.A. Orlistat, a new lipase inhibitor for the  
463 management of obesity. *Pharmacotherapy* **20**, 270-279 (2000).
- 464 22. Benson, K., Cramer, S. & Galla, H.J. Impedance-based cell monitoring: barrier properties  
465 and beyond. *Fluids Barriers CNS* **10**, 5 (2013).
- 466 23. Prentice, E., McAuliffe, J., Lu, X., Subbarao, K. & Denison, M.R. Identification and  
467 characterization of severe acute respiratory syndrome coronavirus replicase proteins. *J*  
468 *Virol* **78**, 9977-9986 (2004).
- 469 24. Gordon, C.J. *et al.* Remdesivir is a direct-acting antiviral that inhibits RNA-dependent  
470 RNA polymerase from severe acute respiratory syndrome coronavirus 2 with high  
471 potency. *J Biol Chem* **295**, 6785-6797 (2020).
- 472 25. Wu, J., Wu, B. & Lai, T. Compassionate Use of Remdesivir in Covid-19. *N Engl J Med*  
473 **382** (2020).
- 474 26. Bago, R. *et al.* Characterization of VPS34-IN1, a selective inhibitor of Vps34, reveals  
475 that the phosphatidylinositol 3-phosphate-binding SGK3 protein kinase is a downstream  
476 target of class III phosphoinositide 3-kinase. *Biochem J* **463**, 413-427 (2014).
- 477 27. Wakil, S.J. & Abu-Elheiga, L.A. Fatty acid metabolism: target for metabolic syndrome. *J*  
478 *Lipid Res* **50 Suppl**, S138-143 (2009).
- 479 28. Schütter, M., Giavalisco, P., Brodesser, S. & Graef, M. Local Fatty Acid Channeling into  
480 Phospholipid Synthesis Drives Phagophore Expansion during Autophagy. *Cell* **180**, 135-  
481 149.e114 (2020).
- 482 29. Bakhache, W. *et al.* Fatty acid synthase and stearoyl-CoA desaturase-1 are conserved  
483 druggable cofactors of Old World Alphavirus genome replication. *Antiviral Res* **172**,  
484 104642 (2019).
- 485 30. Nasheri, N. *et al.* Modulation of fatty acid synthase enzyme activity and expression  
486 during hepatitis C virus replication. *Chem Biol* **20**, 570-582 (2013).
- 487 31. Herker, E. *et al.* Efficient hepatitis C virus particle formation requires diacylglycerol  
488 acyltransferase-1. *Nat Med* **16**, 1295-1298 (2010).
- 489 32. Cao, J. *et al.* Targeting Acyl-CoA:diacylglycerol acyltransferase 1 (DGAT1) with small  
490 molecule inhibitors for the treatment of metabolic diseases. *J Biol Chem* **286**, 41838-  
491 41851 (2011).
- 492 33. Futatsugi, K. *et al.* Discovery and Optimization of Imidazopyridine-Based Inhibitors of  
493 Diacylglycerol Acyltransferase 2 (DGAT2). *J Med Chem* **58**, 7173-7185 (2015).
- 494 34. Sims, A.C. *et al.* Severe acute respiratory syndrome coronavirus infection of human  
495 ciliated airway epithelia: role of ciliated cells in viral spread in the conducting airways of  
496 the lungs. *J Virol* **79**, 15511-15524 (2005).
- 497 35. Sims, A.C., Burkett, S.E., Yount, B. & Pickles, R.J. SARS-CoV replication and  
498 pathogenesis in an in vitro model of the human conducting airway epithelium. *Virus Res*  
499 **133**, 33-44 (2008).
- 500 36. Nagy, P.D., Strating, J.R. & van Kuppeveld, F.J. Building Viral Replication Organelles:  
501 Close Encounters of the Membrane Types. *PLoS Pathog* **12**, e1005912 (2016).
- 502 37. Sasvari, Z. & Nagy, P.D. Making of viral replication organelles by remodeling interior  
503 membranes. *Viruses* **2**, 2436-2442 (2010).

- 504 38. den Boon, J.A. & Ahlquist, P. Organelle-like membrane compartmentalization of  
505 positive-strand RNA virus replication factories. *Annu Rev Microbiol* **64**, 241-256 (2010).
- 506 39. Santiago, F.W. *et al.* Hijacking of RIG-I signaling proteins into virus-induced  
507 cytoplasmic structures correlates with the inhibition of type I interferon responses. *J Virol*  
508 **88**, 4572-4585 (2014).
- 509 40. Morris, D.H., Yip, C.K., Shi, Y., Chait, B.T. & Wang, Q.J. Beclin 1-Vps34 Complex  
510 Architecture: Understanding the Nuts and Bolts of Therapeutic Targets. *Front Biol*  
511 (*Beijing*) **10**, 398-426 (2015).
- 512 41. Chude, C.I. & Amaravadi, R.K. Targeting Autophagy in Cancer: Update on Clinical  
513 Trials and Novel Inhibitors. *Int J Mol Sci* **18** (2017).
- 514 42. Dowdle, W.E. *et al.* Selective VPS34 inhibitor blocks autophagy and uncovers a role for  
515 NCOA4 in ferritin degradation and iron homeostasis in vivo. *Nat Cell Biol* **16**, 1069-1079  
516 (2014).
- 517 43. Backer, J.M. The intricate regulation and complex functions of the Class III  
518 phosphoinositide 3-kinase Vps34. *Biochem J* **473**, 2251-2271 (2016).
- 519 44. Guo, L. *et al.* Autophagy Negatively Regulates Transmissible Gastroenteritis Virus  
520 Replication. *Sci Rep* **6**, 23864 (2016).
- 521 45. Gassen, N.C. *et al.* SKP2 attenuates autophagy through Beclin1-ubiquitination and its  
522 inhibition reduces MERS-Coronavirus infection. *Nat Commun* **10**, 5770 (2019).
- 523 46. Wakil, S.J. Fatty acid synthase, a proficient multifunctional enzyme. *Biochemistry* **28**,  
524 4523-4530 (1989).
- 525 47. Schcolnik-Cabrera, A. *et al.* Orlistat as a FASN inhibitor and multitargeted agent for  
526 cancer therapy. *Expert Opin Investig Drugs* **27**, 475-489 (2018).
- 527 48. Heaton, N.S. *et al.* Dengue virus nonstructural protein 3 redistributes fatty acid synthase  
528 to sites of viral replication and increases cellular fatty acid synthesis. *Proc Natl Acad Sci*  
529 *USA* **107**, 17345-17350 (2010).
- 530 49. Wilsky, S. *et al.* Inhibition of fatty acid synthase by amentoflavone reduces  
531 coxsackievirus B3 replication. *Arch Virol* **157**, 259-269 (2012).
- 532 50. Tang, W.C., Lin, R.J., Liao, C.L. & Lin, Y.L. Rab18 facilitates dengue virus infection by  
533 targeting fatty acid synthase to sites of viral replication. *J Virol* **88**, 6793-6804 (2014).
- 534 51. Gordon, D.E. *et al.* A SARS-CoV-2 protein interaction map reveals targets for drug  
535 repurposing. *Nature* **583**, 459-468 (2020).
- 536 52. Olzmann, J.A. & Carvalho, P. Dynamics and functions of lipid droplets. *Nat Rev Mol*  
537 *Cell Biol* **20**, 137-155 (2019).
- 538 53. Matsuda, D. *et al.* Anti-atherosclerotic activity of triacsin C, an acyl-CoA synthetase  
539 inhibitor. *J Antibiot (Tokyo)* **61**, 318-321 (2008).
- 540 54. Rossi Sebastiano, M. & Konstantinidou, G. Targeting Long Chain Acyl-CoA Synthetases  
541 for Cancer Therapy. *Int J Mol Sci* **20** (2019).

542

543

544 **FIGURE LEGENDS**

545 **Figure 1. Standardization of an electrical resistance-based assay as a measure of SARS-**  
546 **CoV-2 induced CPE and anti-SARS-CoV-2 activity.** VeroE6 cells were seeded into a  
547 CytoView-Z 96-well plate and cells were allowed to stabilize overnight, as measured by  
548 electrical resistance. **A)** SARS-CoV-2 was titrated in 10-fold dilutions ranging from 10-0.0001  
549 MOI. Resistance was measured every minute over the course of 72 hours. Solid lines indicate the  
550 mean, dotted lines indicate the standard error of three replicates. **B)** Median time to death  
551 calculations based on raw resistance data for each MOI. **C)** Remdesivir was titrated in 6-fold  
552 dilutions ranging from 50-0.006  $\mu$ M. After infection at an MOI of 0.01, resistance was  
553 monitored for 48 h.p.i. and **D)** percent inhibition was determined at the 48 hour timepoint.

554

555 **Figure 2. VPS34 inhibitors exhibit anti-SARS-CoV-2 activity.** VeroE6 cells were seeded into  
556 a CytoView-Z 96-well plate, and cells were allowed to stabilize overnight. Cells were pre-treated  
557 with serial half-log dilutions of **A)** VPS34-IN1 or **C)** PIK-III and infected with SARS-CoV-2 at  
558 an MOI=0.01. Resistance (**A and C**) was measured every minute over the course of 48 hours and  
559 percent inhibition (**B and D**) was determined at the 48-hour timepoint. Solid lines indicate mean,  
560 dotted lines indicate the standard error of two replicates.

561

562 **Figure 3. Screening of fatty acid inhibitors for potential anti-SARS-CoV-2 activity.** VeroE6  
563 cells were seeded into a CytoView-Z 96-well plate and allowed to stabilize overnight. Cells were  
564 pre-treated with serial half-log dilutions of **A)** Orlistat or **B)** Triacsin C and infected with SARS-  
565 CoV-2 at an MOI=0.01. Resistance (**A and C**) was measured every minute over the course of 48



566 hours and percent inhibition (**B and D**) was determined at the 48-hour timepoint. Solid lines  
567 indicate the mean and dotted lines indicate the standard error of two replicates.

568

569 **Figure 4. Single treatment of VPS34 inhibitors have potent anti-viral activity against**  
570 **SARS-CoV-2.** VeroE6 cells were seeded into a CytoView-Z 96-well plate, and allowed to  
571 stabilize overnight. **A)** Timeline for the time-of-addition experiment. **B)** VeroE6 cells were pre-  
572 treated for one hour and compound was removed (-1), pre-treated for one hour with compound  
573 maintained throughout infection (+1), or treated at 2 (+2) or 4 (+4) hours post-infection with an  
574 MOI of 0.01. Resistance was measured every minute over the course of 48 hours and percent  
575 inhibition was determined at the 48-hour timepoint. Data is representative of the mean and  
576 standard error of three technical replicates.

577

578 **Figure 5. Attenuation of VPS34 kinase activity and fatty acid metabolism inhibit SARS-**  
579 **CoV-2 replication in human airway epithelial cell line.** Calu-3 cells were plated onto a 96-  
580 well plate and allowed to reach 95% confluency. Cells were then pre-treated with a range of  
581 concentrations of **A-B)** VPS34-IN1, **C-D)** PIK-III, **E-F)** Orlistat, **G-H)** Triacsin C, DMSO, or  
582 mock-treated with media alone for 1 hour then infected with SARS-CoV-2 at an MOI of 0.01.  
583 Supernatants were collected at 48 h.p.i. and virus was quantified by plaque assay on VeroE6  
584 cells. The data is reported as plaque forming units per milliliter (pfu/ml) (**left panels**). Cell  
585 viability over 48 hours was determined in parallel. Percent inhibition, IC50, and IC90 were  
586 calculated from the plaque assay data and plotted with the cell viability data (**right panels**). The



587 dotted line labeled DMSO indicates the level of virus growth in the DMSO control. The dotted  
588 line labeled LOD indicates the limit of detection of the plaque assay.

589

590 **Figure 6. VPS34 activity and fatty acid metabolism are required to form SARS-CoV-2 N**  
591 **replication centers.** Calu-3 cells were pre-treated with VPS34-IN1 (5uM), PIK-III (5uM),  
592 Orlistat (500uM), or Triacsin C (50uM) for 1 hour and infected with SARS-CoV-2 at MOI of  
593 0.01. Cells were fixed at 24 h.p.i. and immunofluorescence was performed using primary  
594 antibodies against SARS-CoV-2 N or dsRNA, and AlexaFluor488 or AlexaFluor647 conjugated  
595 secondary antibodies, respectively. Nuclei were stained with Hoeschst 33342. Representative  
596 images are shown.

597

598 **Supplemental Figure 1. Inhibition of DGATs does not prevent SARS-CoV-2 replication.**  
599 VeroE6 cells were seeded into a CytoView-Z 96-well plate and allowed to stabilize overnight.  
600 Cells were pre-treated with serial half-log dilutions of **A)** TC863 or **B)** PF06424439 and infected  
601 with SARS-CoV-2 at an MOI=0.01. Resistance was measured every minute over the course of  
602 48 hours and percent inhibition relative to the DMSO control was determined at the 48-hour  
603 timepoint.

604

605 **Supplemental Figure 2. Inhibition of alpha PI3K does not prevent SARS-CoV-2**  
606 **replication.** Calu-3 cells were plated onto a 96-microplate and allowed to reach 95% confluency.  
607 Cells were then pre-treated with a range of concentrations of BYL719 and infected with SARS-  
608 CoV-2 at an MOI of 0.01. Supernatants were collected at 48 h.p.i. and titered on VeroE6 cells

609 (left panel). Cell toxicity was determined in parallel and percent inhibition extrapolated from  
610 plaque assay data (right panel).

611

612 **Supplemental Figure 3. SARS-CoV-2 N and nascent viral RNA co-localize with the**  
613 **autophagy membrane marker LC3.** VeroE6 cells were infected with SARS-CoV-2. At 24  
614 h.p.i., cells were pre-treated with actinomycin D followed by a 5-ethynyl uridine (EU) chase for  
615 4 hours. **A)** Cells were fixed, EU labeled viral nascent RNA was detected with click chemistry,  
616 and immunofluorescence performed using primary antibodies against SARS-CoV-2 N or LC3  
617 and AlexaFluor488- or AlexaFluor647- conjugated secondary antibodies, respectively. Nuclei  
618 were stained with Hoeschst 33342. Representative images are shown. **B)** Co-localization was  
619 analyzed with Zen Blue.

A.

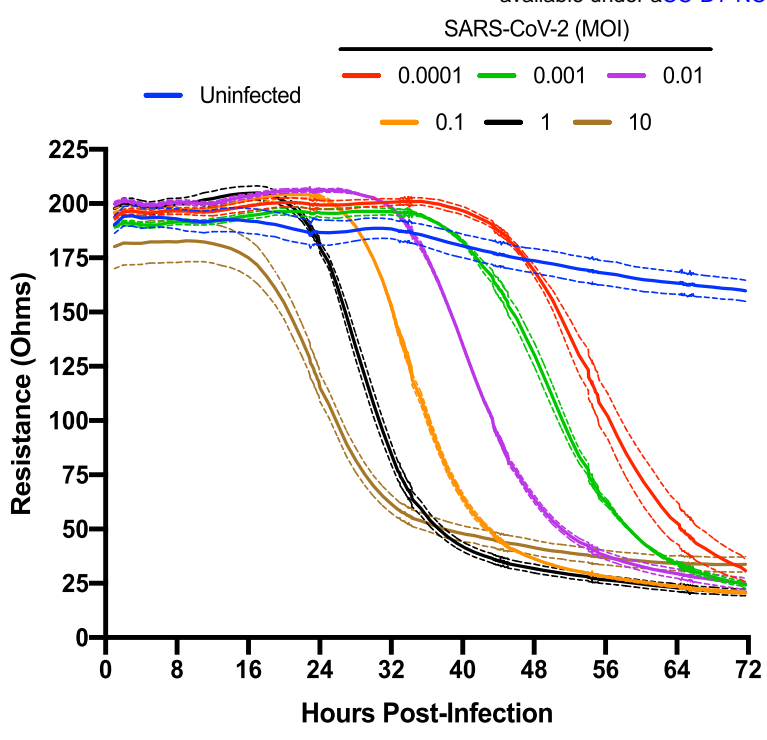

B.

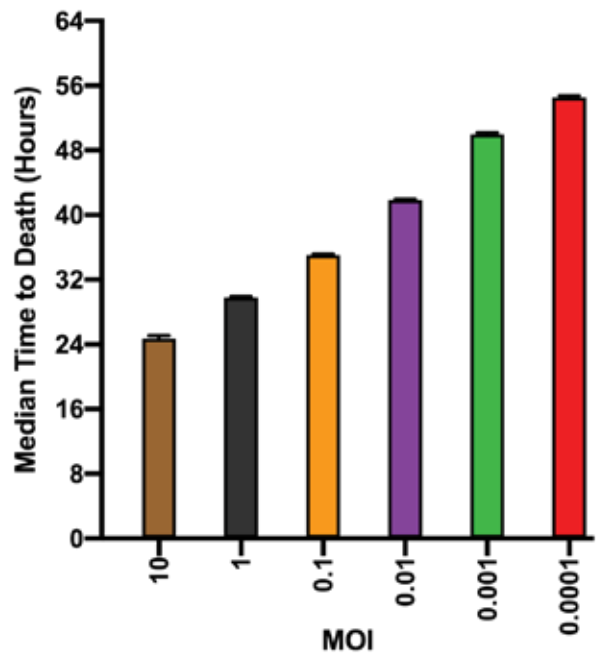

C.

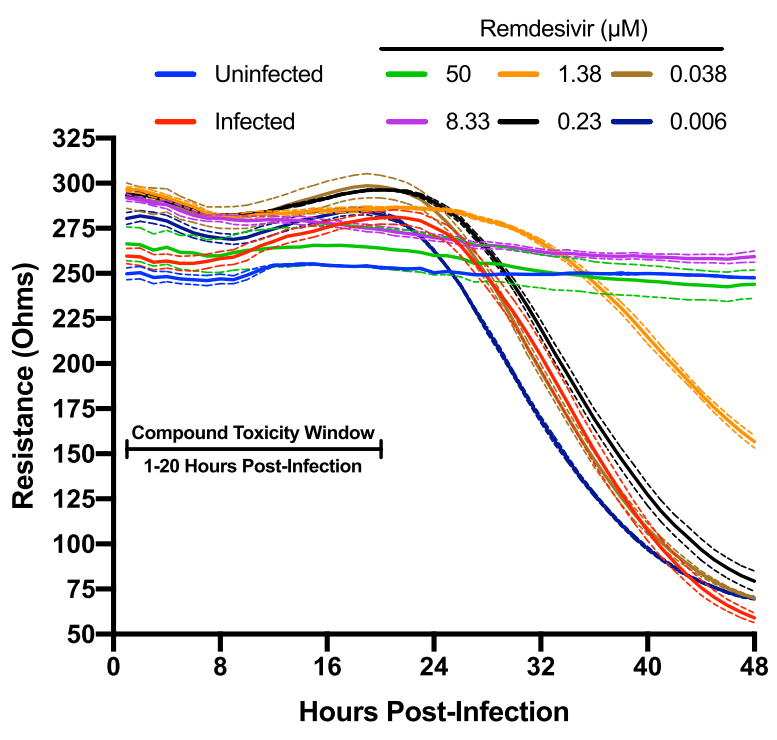

D.

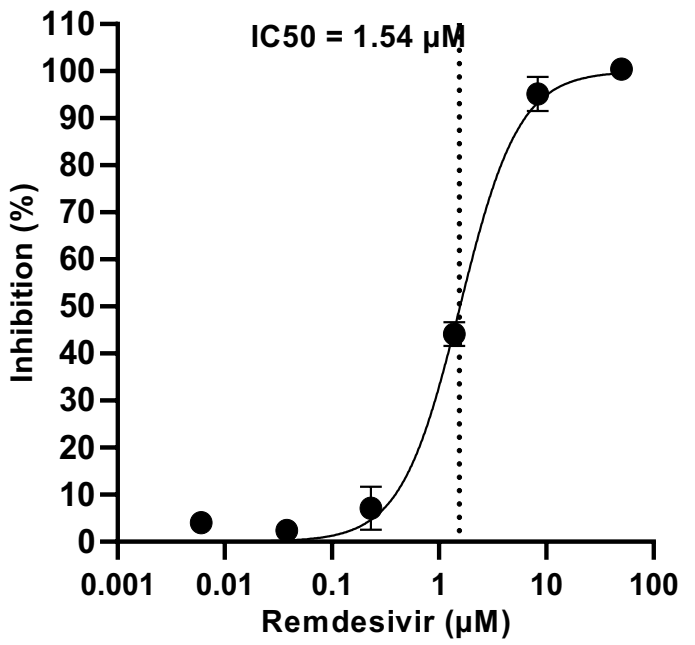

Figure 1.

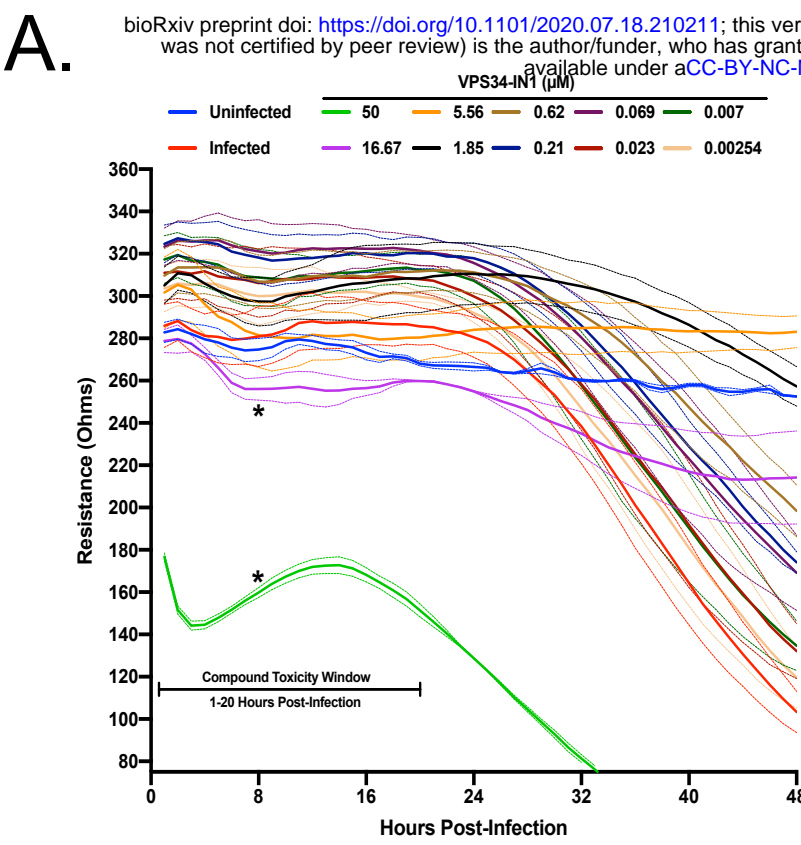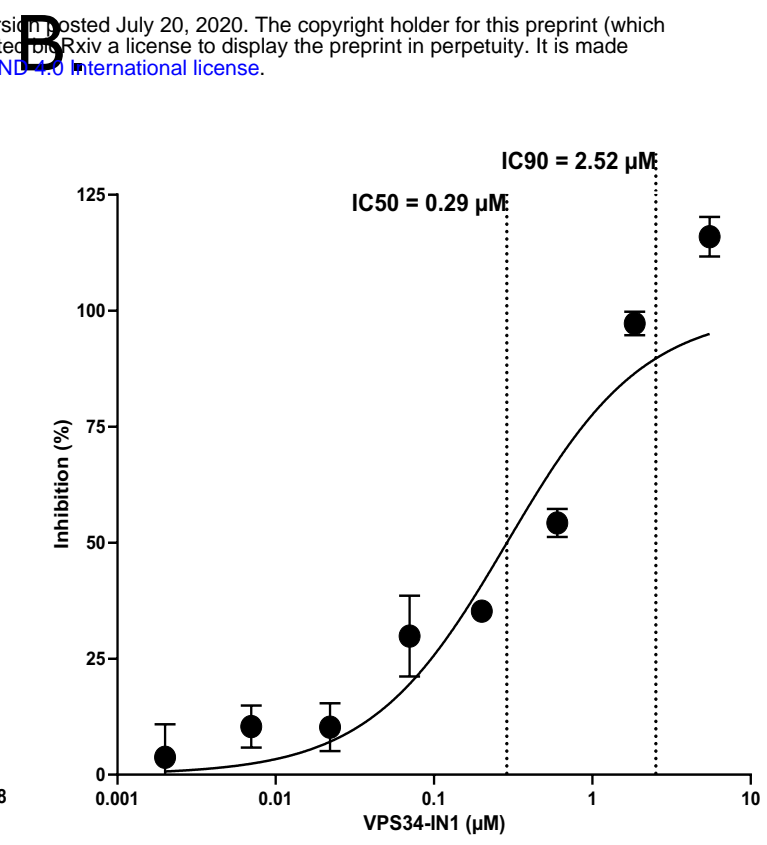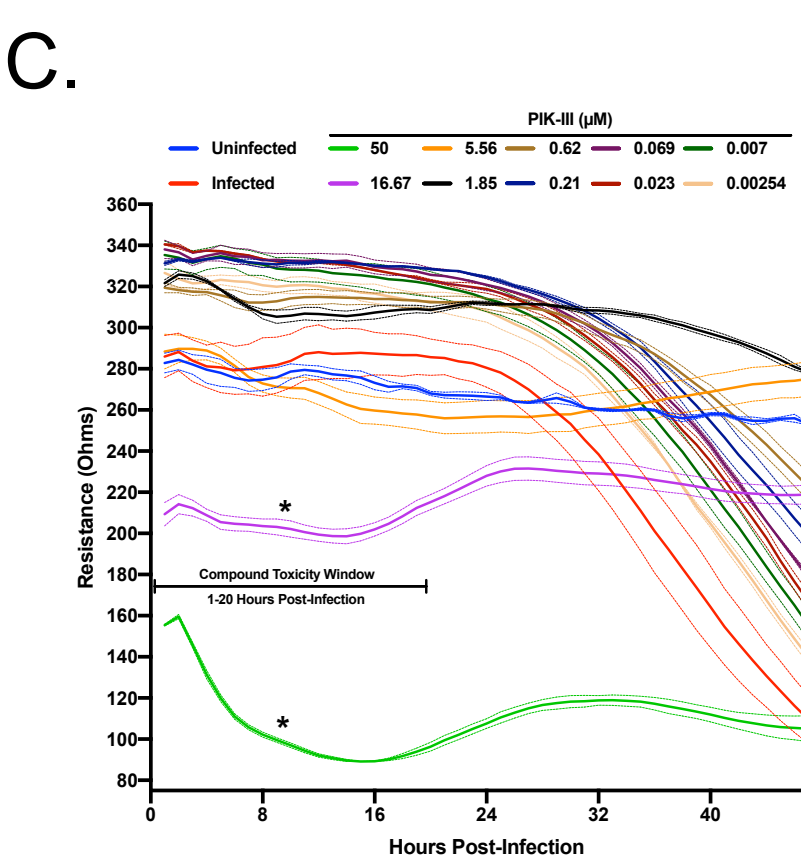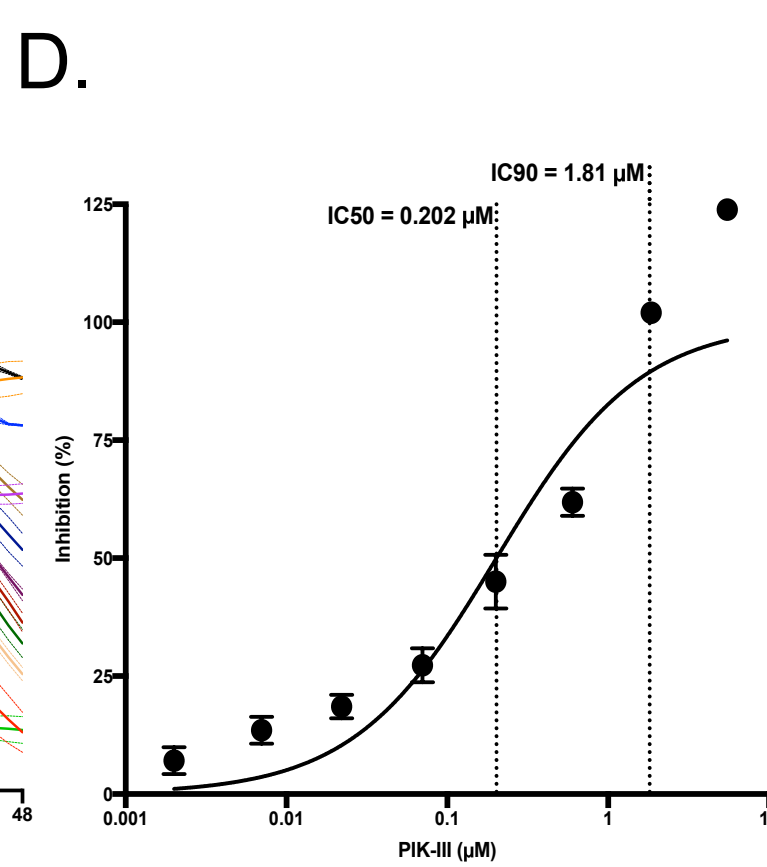

**Figure 2.**

A.

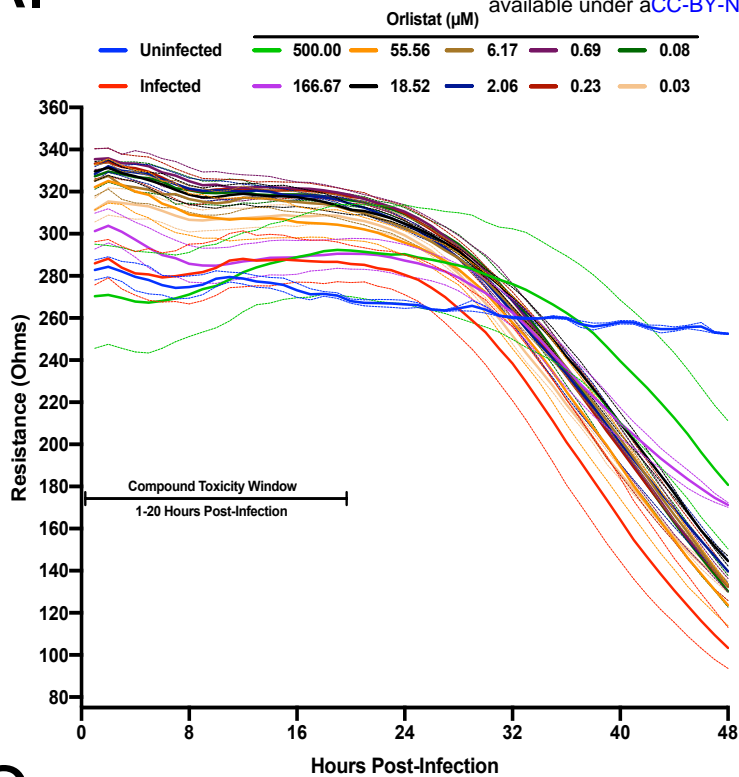

B.

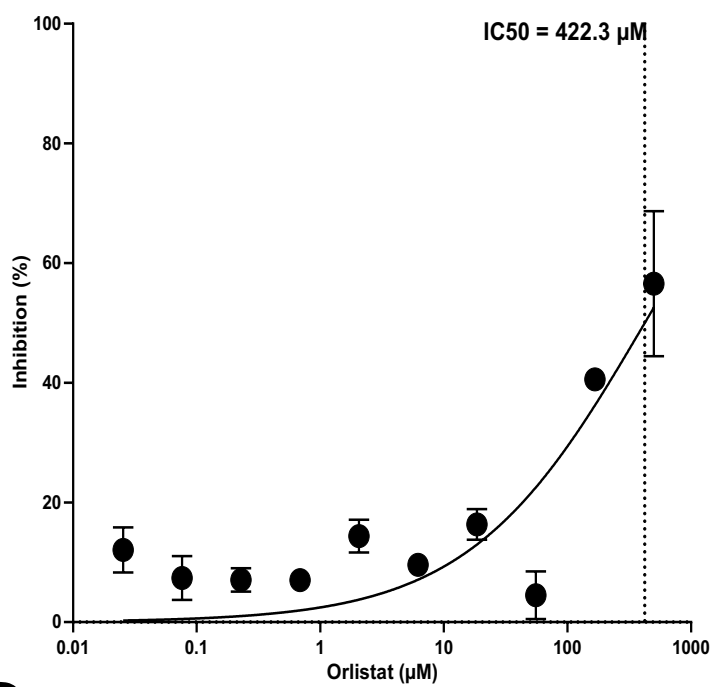

C.

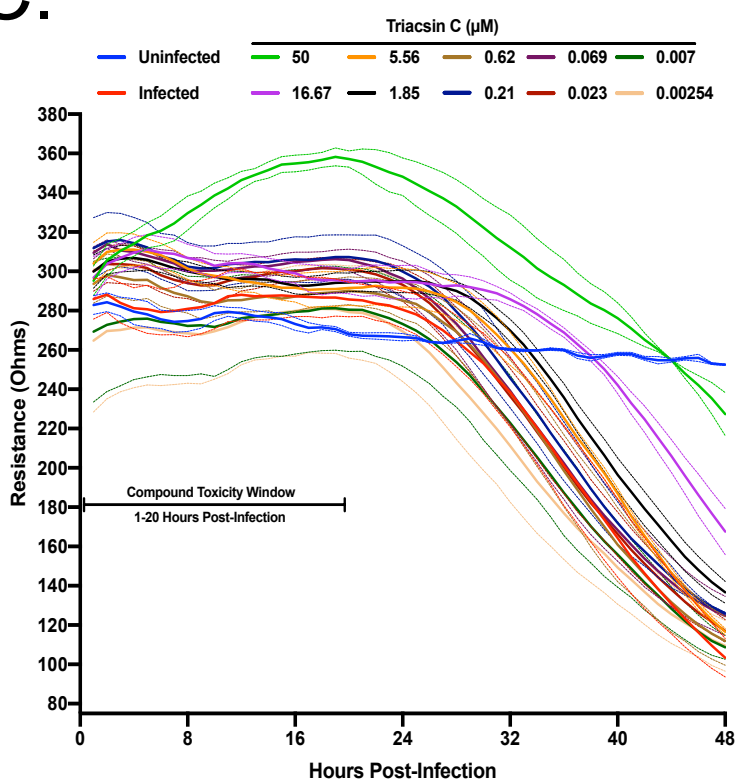

D.

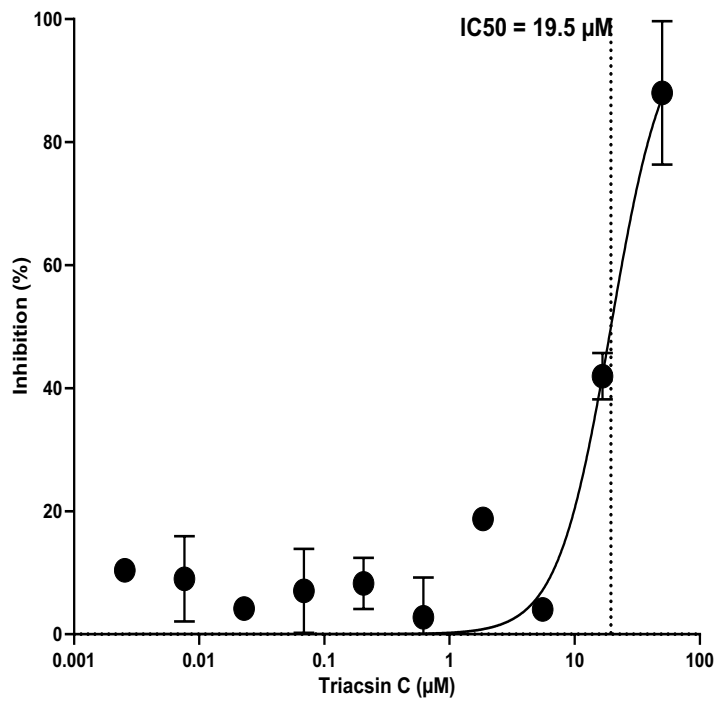

Figure 3.

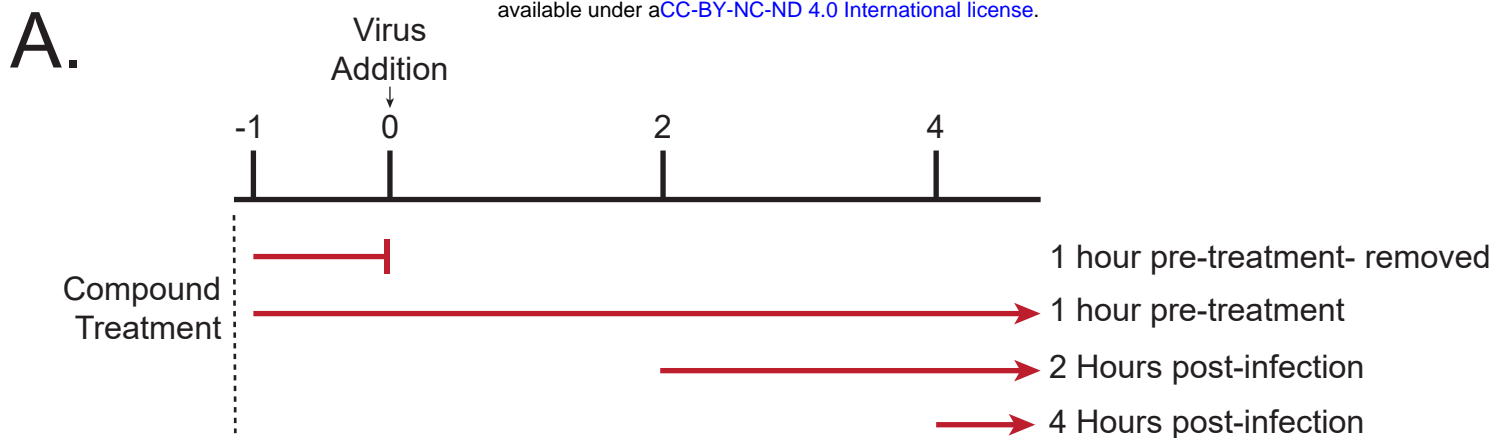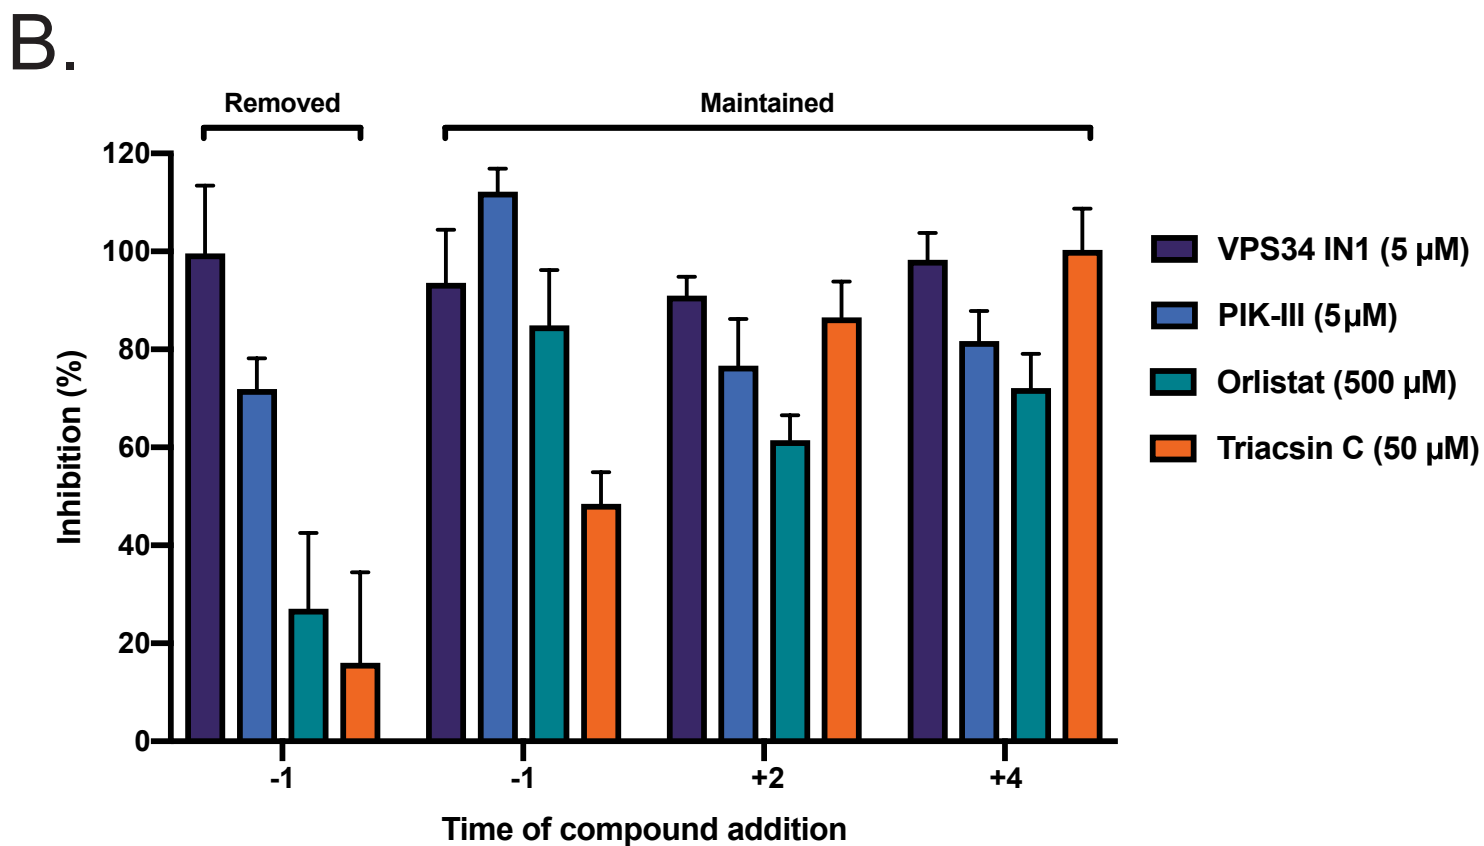

**Figure 4.**

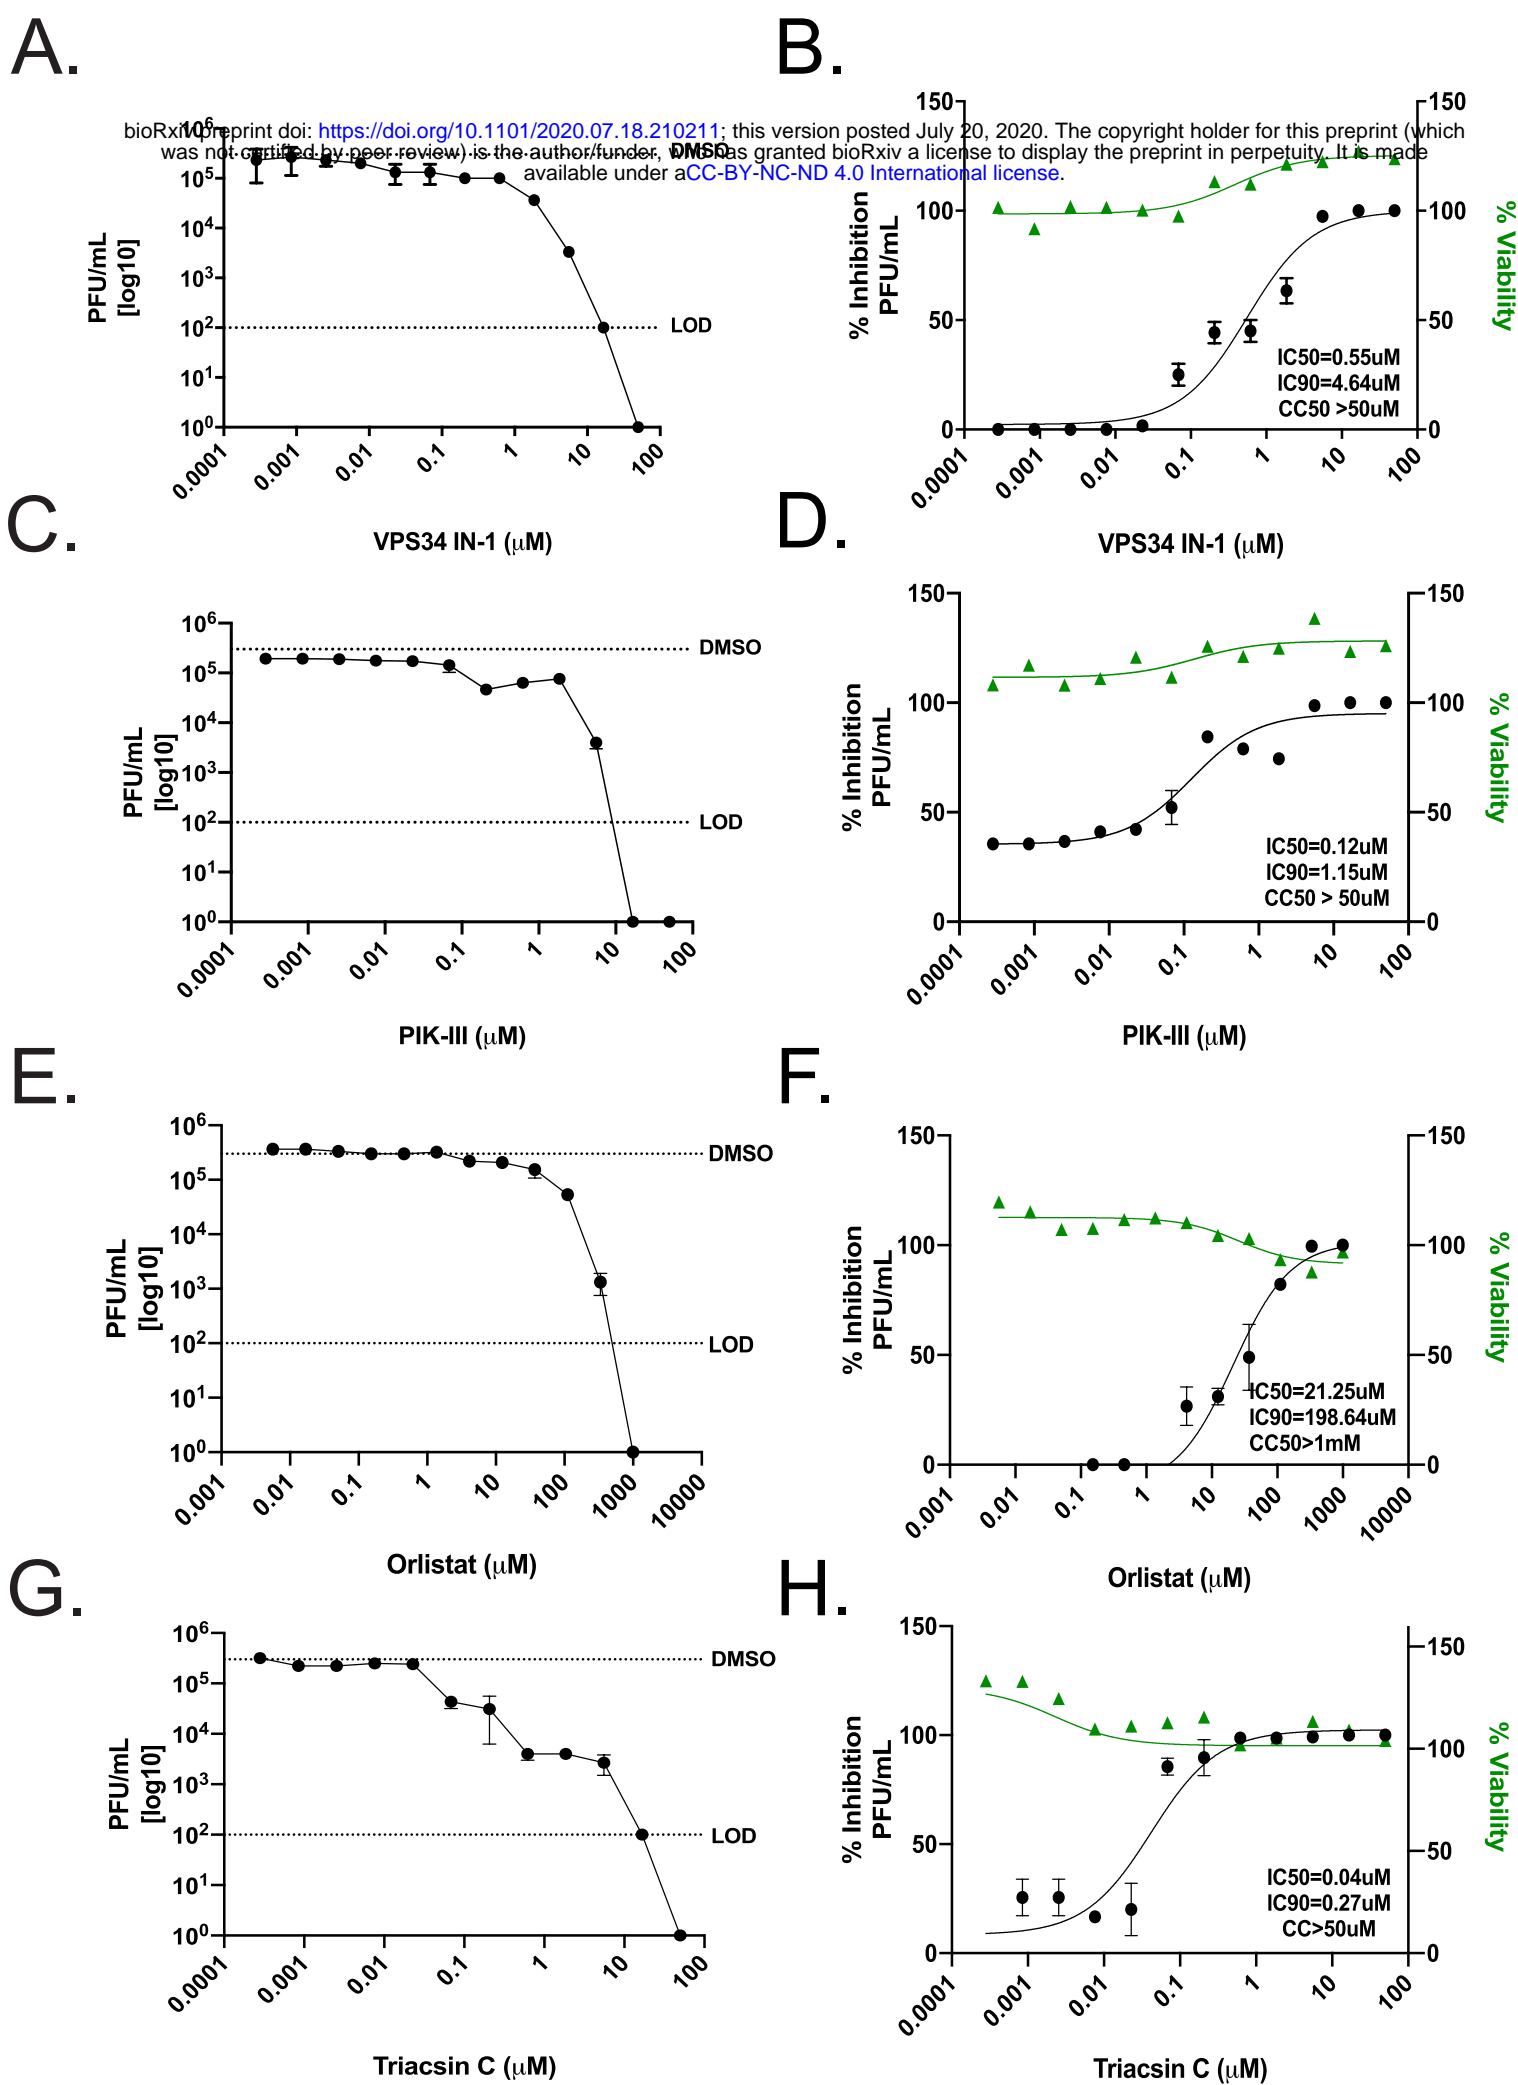

**Figure 5.**



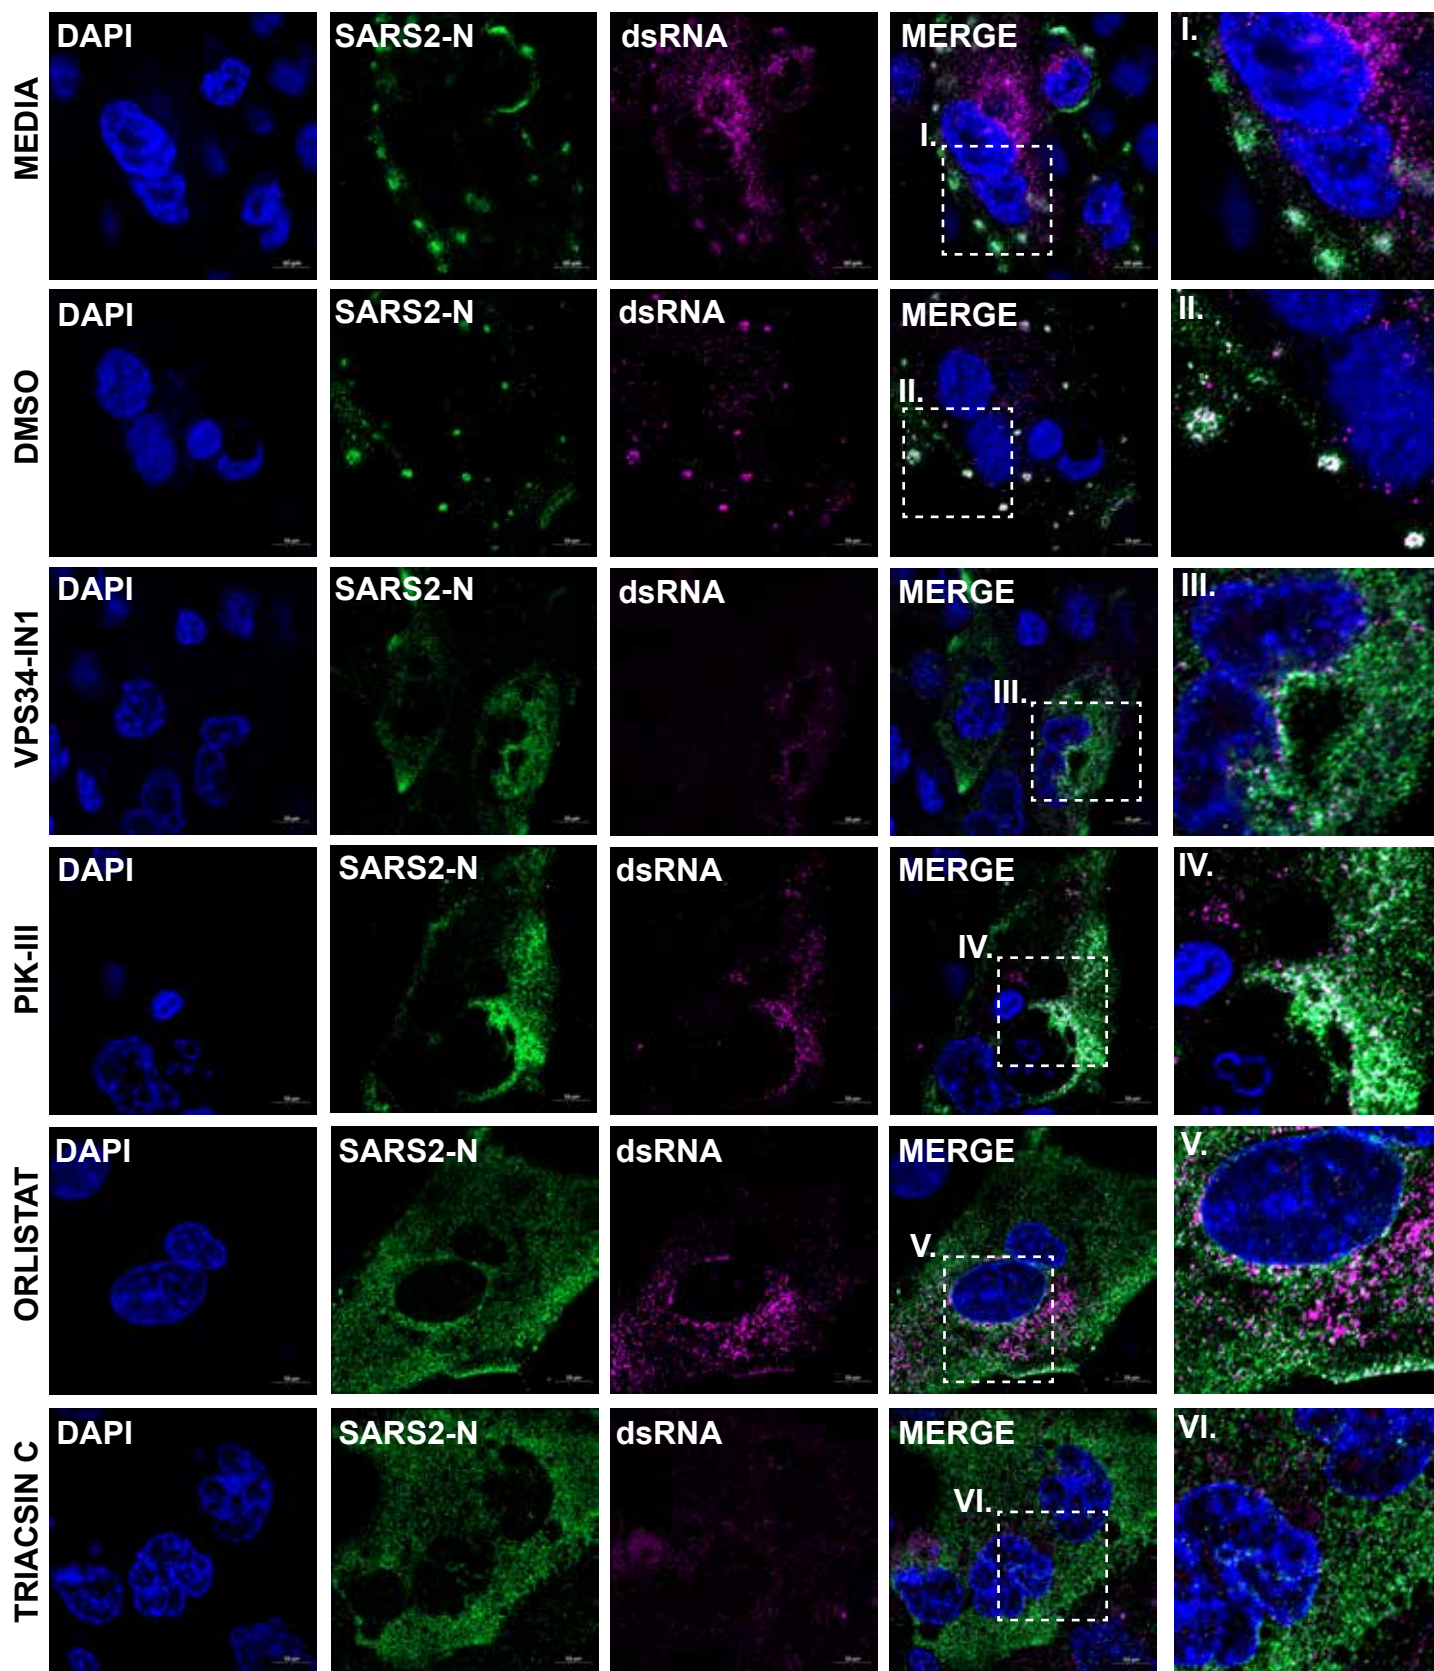

**Figure 6.**



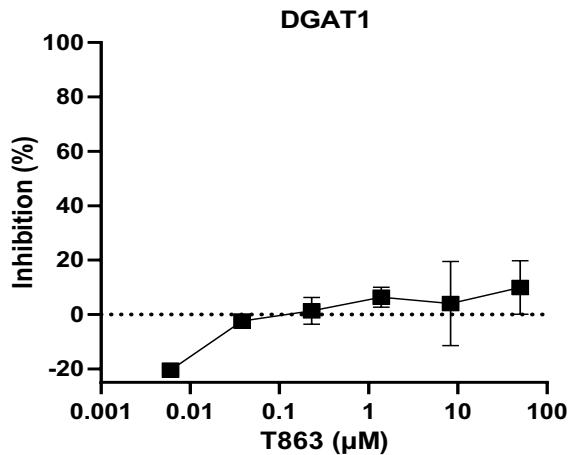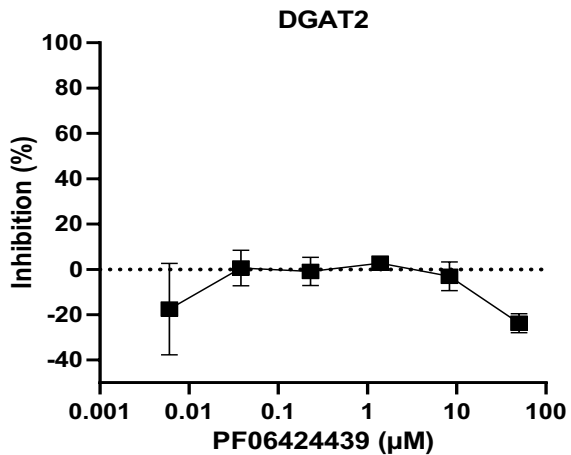

**Supplemental Figure 1.**

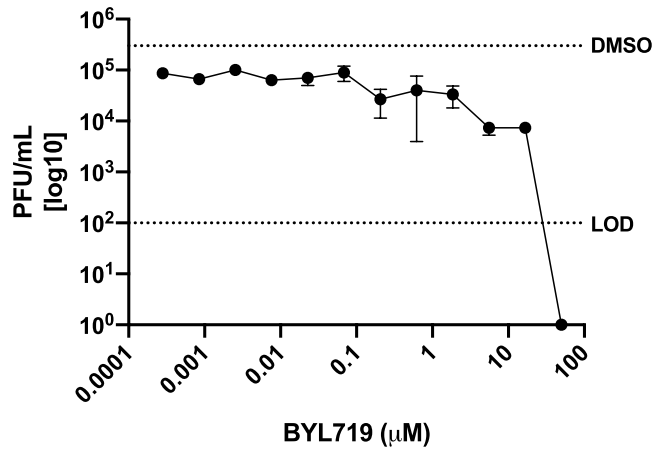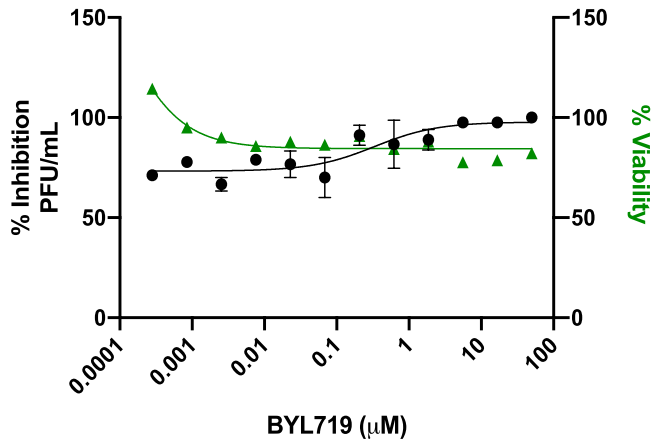

**Supplemental Figure 2.**

A.

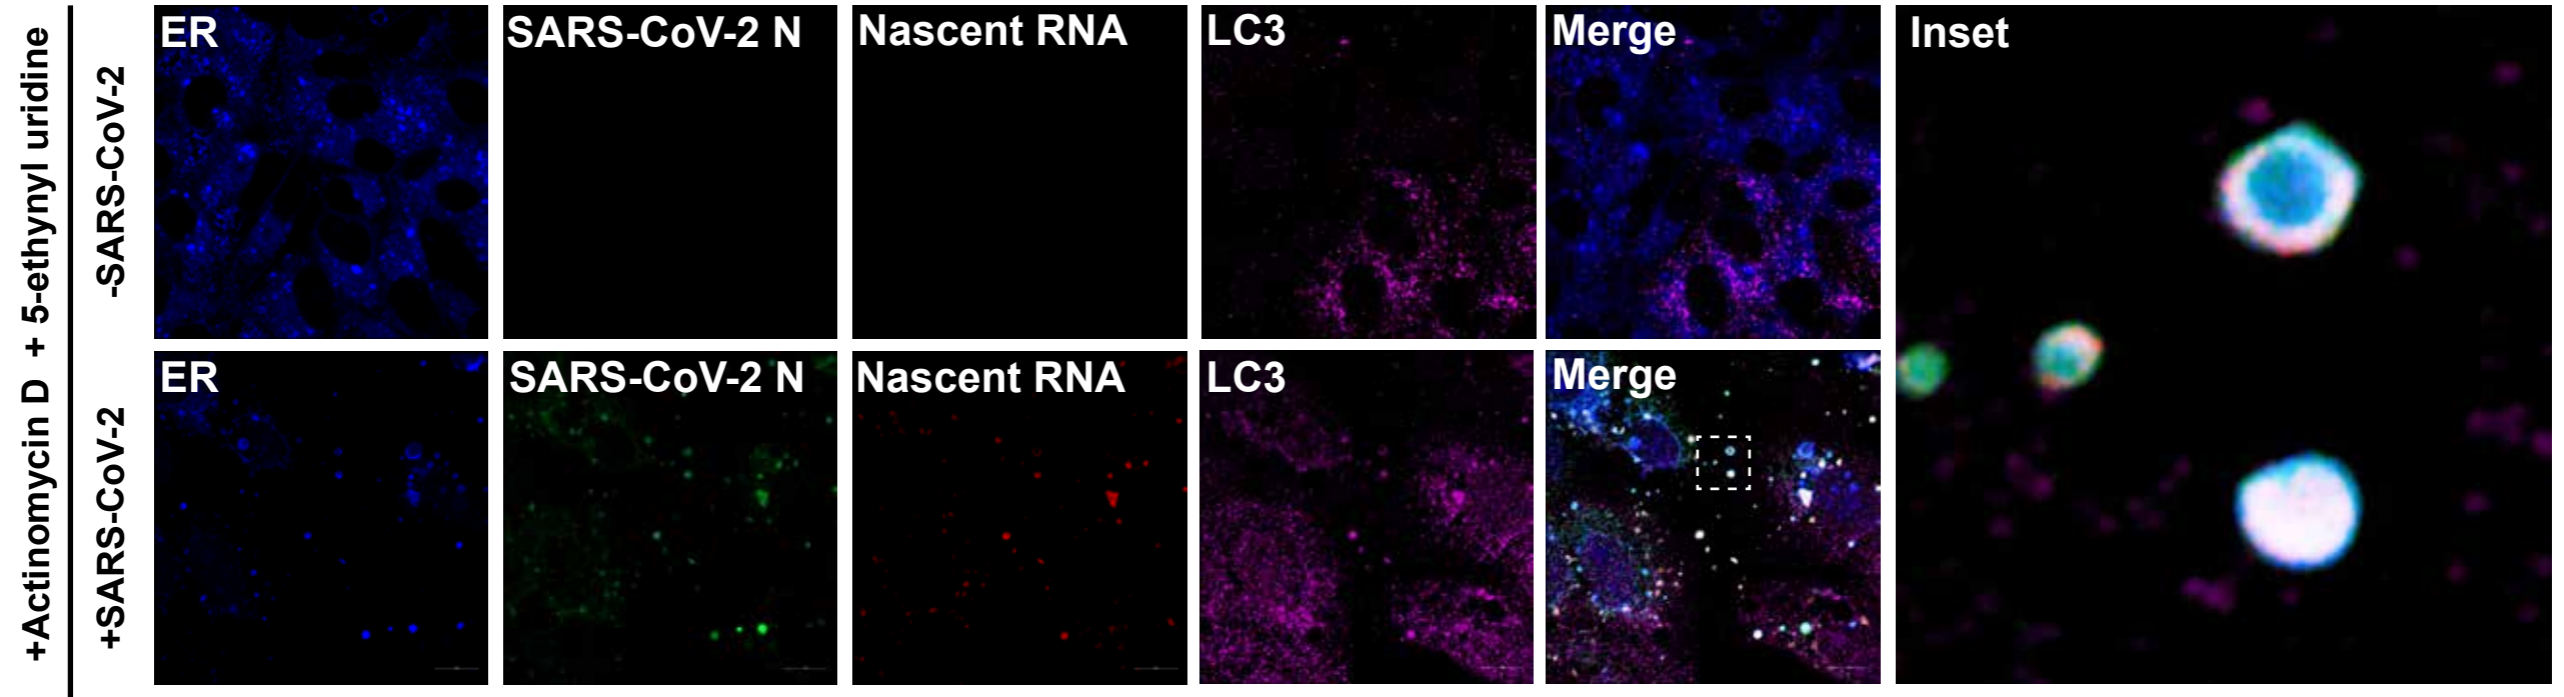

B.

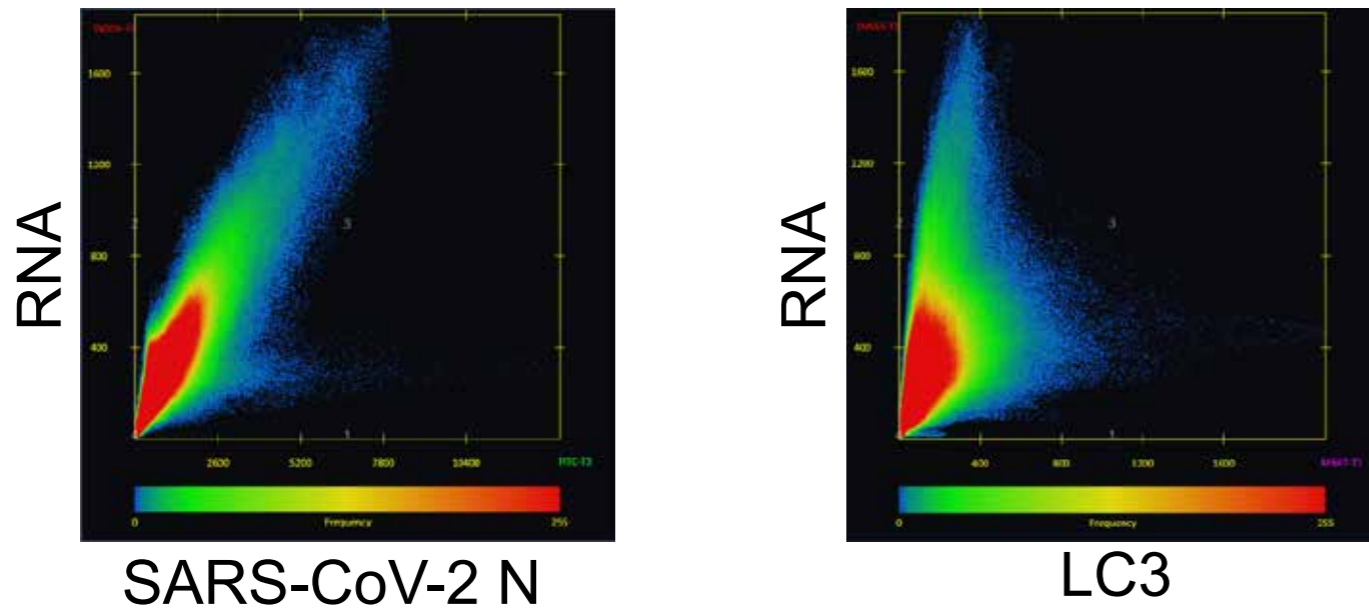

Source: https://www.biorxiv.org/content/10.1101/2020.07.18.210211v1.full.pdf
